# Supplementary material for: Antibiotic use and hygiene interact to influence the distribution of antimicrobial-resistant bacteria in low-income communities in Guatemala
Source: PubMed Central journal article supplement (PMC7426860; doi:10.1038/s41598-020-70741-4), 2020-08-13
Supplement: 41598_2020_70741_MOESM2_ESM.pdf [file 41598_2020_70741_MOESM2_ESM.pdf]

**Antibiotic use and hygiene interact to influence the distribution of antimicrobial-resistant bacteria in low-income communities in Guatemala**

Brooke M. Ramay<sup>¥1,2</sup>, Mark, A. Caudell<sup>¥2,3</sup>, Celia Cordon-Rosales<sup>\*1</sup>, L. Diego Archila<sup>1</sup>, Guy H. Palmer<sup>2,4</sup>, Claudia Jarquin<sup>1</sup>, Purificación Moreno<sup>1</sup>, John P. McCracken<sup>1</sup>, Leah Rozenkrantz<sup>5</sup>, Ofer Amram<sup>2,6</sup>, Sylvia Omulo<sup>2</sup>, Douglas R. Call<sup>2,4</sup>

Brooke M. Ramay, Pharm D<sup>¥</sup>

1) Center for Health Studies, Universidad del Valle de Guatemala,  
181 Avenida 11-95 Guatemala City, Guatemala, 01015

2) Paul G. Allen School for Global Animal Health, Washington State University  
Pullman, WA 99164, United States

Mark, A. Caudell, PhD<sup>¥</sup>

2) Paul G. Allen School for Global Animal Health, Washington State University  
Pullman, WA 99164, United States

3) Food and Agriculture Organization of the United Nations, United Nations Complex  
UN Avenue, Gigiri, Nairobi. PO Box: 30470, 00100

Celia Cordon-Rosales, B.S.\*

1) Center for Health Studies, Universidad del Valle de Guatemala,  
18 Avenida 11-95 Guatemala City, Guatemala, 01015

L. Diego Archila, PhD

1) Center for Health Studies, Universidad del Valle de Guatemala,  
18 Avenida 11-95 Guatemala City, Guatemala, 01015

Guy H. Palmer PhD

2) Paul G. Allen School for Global Animal Health, Washington State University  
Pullman, WA 99164, United States

4) Nelson Mandela African Institution of Science and Technology, P.O.BOX 447 Arusha,  
Tanzania

Claudia Jarquin MSc

1) Center for Health Studies, Universidad del Valle de Guatemala,  
18 Avenida 11-95 Guatemala City, Guatemala, 01015

Purificación Moreno MSc

1) Center for Health Studies, Universidad del Valle de Guatemala,  
18 Avenida 11-95 Guatemala City, Guatemala, 01015

John P. McCracken DrPH

1) Center for Health Studies, Universidad del Valle de Guatemala,  
18 Avenida 11-95 Guatemala City, Guatemala, 01015

Leah Rozenkrantz PhD

5) Department of Geography, Simon Fraser University, Burnaby V5A 1S6, British Columbia,  
Canada

Ofer Amram PhD

2) Paul G. Allen School for Global Animal Health, Washington State University  
Pullman, WA 99164, United States

6) Elson S. Floyd College of Medicine, Washington State University, Spokane, PO Box 1495,  
WA, USA

Sylvia Omulo, PhD

2) Paul G. Allen School for Global Animal Health, Washington State University  
Pullman, WA 99164, United States

Douglas R. Call PhD

2) Paul G. Allen School for Global Animal Health, Washington State University  
Pullman, WA 99164, United States

4) Nelson Mandela African Institution of Science and Technology, P.O.BOX 447 Arusha,  
Tanzania

¥ Authors contributed equally

\*corresponding author: [ccordon@ces.uvg.edu.gt](mailto:ccordon@ces.uvg.edu.gt), (502) 2329-8452

# Cuestionario De Hogar

Record ID \_\_\_\_\_

Fecha en que se realiza la encuesta \_\_\_\_\_

I. Buenos días/tardes, mi nombre es (NOMBRE PERSONA HABLANDO) y vengo hoy con mi compañero de trabajo (NOMBRE COMPAÑERO DEL TRABAJO). Estamos visitando su casa el día de hoy porque estamos realizando un estudio sobre la resistencia a los antibióticos. Sería posible hablar con el jefe o encargado del hogar para ver si le interesa aprender más sobre el estudio?

- a. Si- continuar  
 b. No, no esta el jefe del hogar o encargado del hogar  
 c. No, no quiero escuchar mas

EXPLIQUE SOBRE EL ESTUDIO, Y QUE NECESITARA LA PARTICIPACION DE UN ADULTO Y UN NIÑO QUE SELECCIONE LA TABLET. PRIMERO SE SOLICITARA EL CONSENTIMIENTO DEL JEFE/ENCARGADO DE HOGAR.

El jefe o encargado de hogar ha dado su consentimiento para participar?

- a. Si-Continuar  
 b. No-Terminar

1. Cuantas personas adultas (>18 años) viven en esta vivienda \_\_\_\_\_

---

## 2. Para cada persona adulta identificada en la pregunta 1; indique el nombre de cada uno.

indique el nombre persona 1 \_\_\_\_\_

El adulto (1) ha vivido en la casa durante por lo menos un año?

- a. Si  
 b. No

El adulto (1) vivira en la misma casa por lo menos un año mas?

- a. Si  
 b. No

(1) ES ELEGIBLE O NO= \_\_\_\_\_

PERSONA ELEGIBLE

indique el nombre persona 2 \_\_\_\_\_

El adulto (2) ha vivido en la casa durante por lo menos un año?

- a. Si  
 b. No

El adulto (2) vivira en la misma casa por lo menos un año mas?

- a. Si  
 b. No

(2) ES ELEGIBLE O NO= \_\_\_\_\_

PERSONA ELEGIBLE

indique el nombre persona 3 \_\_\_\_\_

El adulto (3) ha vivido en la casa durante por lo menos un año?

- a. Si  
 b. No

El adulto (3) vivira en la misma casa por lo menos un año mas?

- a. Si  
 b. No

(3) ES ELEGIBLE O NO= \_\_\_\_\_

PERSONA ELEGIBLE

indique el nombre persona 4 \_\_\_\_\_

El adulto (4) ha vivido en la casa durante por lo menos un año?

- a. Si
- b. No

El adulto (4) vivira en la misma casa por lo menos un año mas?

- a. Si
- b. No

(4)ES ELEGIBLE O NO= \_\_\_\_\_

PERSONA ELEGIBLE

indique el nombre persona 5 \_\_\_\_\_

El adulto (5) ha vivido en la casa durante por lo menos un año?

- a. Si
- b. No

El adulto (5) vivira en la misma casa por lo menos un año mas?

- a. Si
- b. No

(5) ES ELEGIBLE O NO= \_\_\_\_\_

PERSONA ELEGIBLE

indique el nombre persona 6 \_\_\_\_\_

El adulto (6) ha vivido en la casa durante por lo menos un año?

- a. Si
- b. No

El adulto (6) vivira en la misma casa por lo menos un año mas?

- a. Si
- b. No

(6)ES ELEGIBLE O NO= \_\_\_\_\_

PERSONA ELEGIBLE

indique el nombre persona 7 \_\_\_\_\_

El adulto (7) ha vivido en la casa durante por lo menos un año?

- a. Si
- b. No

El adulto (7) vivira en la misma casa por lo menos un año mas?

- a. Si
- b. No

(7) ES ELEGIBLE O NO= \_\_\_\_\_

PERSONA ELEGIBLE

indique el nombre persona 8 \_\_\_\_\_

El adulto (8) ha vivido en la casa durante por lo menos un año?

- a. Si
- b. No

El adulto (8) vivira en la misma casa por lo menos un año mas?

- a. Si
- b. No

(8)ES ELEGIBLE O NO= \_\_\_\_\_

PERSONA ELEGIBLE

indique el nombre persona 9 \_\_\_\_\_

El adulto (9) ha vivido en la casa durante por lo menos un año?

- a. Si  
 b. No

El adulto (9) vivira en la misma casa por lo menos un año mas?

- a. Si  
 b. No

(9)ES ELEGIBLE O NO=

\_\_\_\_\_

PERSONA ELEGIBLE

indique el nombre persona 10

\_\_\_\_\_

El adulto (10) ha vivido en la casa durante por lo menos un año?

- a. Si  
 b. No

El adulto (10) vivira en la misma casa por lo menos un año mas?

- a. Si  
 b. No

(10)ES ELEGIBLE O NO=

\_\_\_\_\_

PERSONA ELEGIBLE

Lance el dado y escribe el numero que sale (1 al 12)... Seleccione a la persona ADULTA con base en el numero

\_\_\_\_\_

3. Cuantos niños de 0 a 4 años viven en esta vivienda?

\_\_\_\_\_

**4; Para cada niño de 0 a 4 años en la pregunta 3; indique el nombre de cada uno.**

indique el nombre del niño 1

\_\_\_\_\_

El niño (1) ha vivido en la casa durante por lo menos un año?

- a. Si  
 b. No

El niño (1) vivira en la misma casa por lo menos un año mas?

- a. Si  
 b. No

(1) ES ELEGIBLE O NO=

\_\_\_\_\_

NIÑO ELEGIBLE

indique el nombre del niño 2

\_\_\_\_\_

El niño (2) ha vivido en la casa durante por lo menos un año?

- a. Si  
 b. No

El niño (2) vivira en la misma casa por lo menos un año mas?

- a. Si  
 b. No

(2) ES ELEGIBLE O NO=

\_\_\_\_\_

NIÑO ELEGIBLE

indique el nombre del niño 3

\_\_\_\_\_

El niño (3) ha vivido en la casa durante por lo menos un año?

- a. Si  
 b. No

El niño (3) vivira en la misma casa por lo menos un año mas?

- a. Si  
 b. No

(3) ES ELEGIBLE O NO=

\_\_\_\_\_

NIÑ'O ELEGIBLE

indique el nombre del niño 4

\_\_\_\_\_

El niño (4) ha vivido en la casa durante por lo menos un año?

- a. Si
- b. No

El niño (4) vivira en la misma casa por lo menos un año mas?

- a. Si
- b. No

(4) ES ELEGIBLE O NO=

\_\_\_\_\_

NIÑ'O ELEGIBLE

indique el nombre del niño 5

\_\_\_\_\_

El niño (5) ha vivido en la casa durante por lo menos un año?

- a. Si
- b. No

El niño (5) vivira en la misma casa por lo menos un año mas?

- a. Si
- b. No

(5) ES ELEGIBLE O NO=

\_\_\_\_\_

NIÑ'O ELEGIBLE

indique el nombre del niño 6

\_\_\_\_\_

El niño (6) ha vivido en la casa durante por lo menos un año?

- a. Si
- b. No

El niño (6) vivira en la misma casa por lo menos un año mas?

- a. Si
- b. No

(6) ES ELEGIBLE O NO=

\_\_\_\_\_

NIÑ'O ELEGIBLE

indique el nombre del niño 7

\_\_\_\_\_

El niño (7) ha vivido en la casa durante por lo menos un año?

- a. Si
- b. No

El niño (7) vivira en la misma casa por lo menos un año mas?

- a. Si
- b. No

(7) ES ELEGIBLE O NO=

\_\_\_\_\_

NIÑ'O ELEGIBLE

indique el nombre del niño 8

\_\_\_\_\_

El niño (8) ha vivido en la casa durante por lo menos un año?

- a. Si
- b. No

El niño (8) vivira en la misma casa por lo menos un año mas?

- a. Si
- b. No

(8) ES ELEGIBLE O NO=

\_\_\_\_\_

NIÑ'O ELEGIBLE

indique el nombre del ni±o 9

\_\_\_\_\_

El ni±o (9) ha vivido en la casa durante por lo menos un a±o?

- a. Si  
 b. No

El ni±o (9) vivira en la misma casa por lo menos un a±o mas?

- a. Si  
 b. No

(9) ES ELEGIBLE O NO=

\_\_\_\_\_

NI±O ELEGIBLE

indique el nombre del ni±o 10

\_\_\_\_\_

El ni±o (10) ha vivido en la casa durante por lo menos un a±o?

- a. Si  
 b. No

El ni±o (10) vivira en la misma casa por lo menos un a±o mas?

- a. Si  
 b. No

(10) ES ELEGIBLE O NO=

\_\_\_\_\_

NI±O ELEGIBLE

Lance el dado y escribe el numero que sale (1 al 12)... Seleccione al NI±O con base en el numero

\_\_\_\_\_

(Explicar que la Tablet escogera a un adulto y un ni±o para hacerles el cuestionario. Al seleccionar a los participantes, explicarles el estudio y pedirles el consentimiento. Si las personas seleccionadas no estan alli en ese momento, pregunte a que hora podra encontrarlas y explique que volvera).

5. Se obtuvo el consentimiento informado para el adulto?

- a. Si  
 b. No se encuentra en casa el adulto seleccionado (Apuntar datos de contacto)  
 c. No hay ning±n adulto que quiera participar

6. Se obtuvo el consentimiento informado para el ni±o?

- a. Si  
 b. No se encuentra en casa el ni±o seleccionado (Apuntar datos de contacto)  
 c. No hay ning±n ni±o que quiera participar

INFORMACIoN DEMOGRaFICA del representante del hogar

1. ID del representante del hogar

\_\_\_\_\_

2. Localidad

- Coatepeque  
 San Juan Ostuncalco

a. Coatepeque (listado definido de opciones)

- 1.El Jardin  
 2.La Union

b. San Juan Ostuncalco (listado definido de opciones)

- 1.Casco Urbano  
 2.Monrovia

3. Sexo

- a. Masculino  
 b. Femenino

4. Cuantos a±os tiene? (anotar # a±os completos)

\_\_\_\_\_

5. Usted es el jefe del hogar?

- a. Si  
 b. No



6. Especificar, cual es su relacion con el jefe del hogar

- a. Mama/Papa  
 b. Esposa/esposo  
 c. Hermana/Hermano  
 d. Cuñada/Cuñado  
 e. Hija/Hijo  
 f. Nieta/Nieto

7. De que etnia se considera usted?

- a. Indígena  
 b. Ladino  
 c. Otro. Especificar.  
 d. Desconocido  
 e. Se rehúsa a responder
- 

Otro

8. Si se identifica como indigena, A cual grupo etnico pertenece usted?

- a. Maya  
 b. Xinca  
 c. Ladino  
 d. Garífuna  
 e. Mestizo  
 f. Otro  
 g. Se rehúsa a responder
- 

Otro

9. Que idioma hablan por lo general en su hogar?

- a. Español  
 b. K'iche'  
 c. Mam  
 d. kachiquel  
 e. Otro  
 f. Se rehúsa a responder
- 

Otro

10. Sabe usted leer y escribir?

- a. Si  
 b. No  
 c. Se rehúsa a responder

11. Cual fue el nivel academico que usted completo?

- a. Ninguna educación formal (no fue al colegio)  
 b. No completó educación primaria  
 c. Completó educación primaria  
 d. Completó educación secundaria  
 e. Completó educación mayor a la secundaria  
 f. Otro  
 g. No quiere responder
- 

Otro:

Aparatos del hogar

Celular?

- Si  
 No  
 No sabe  
 Se rehúsa a responder

TV?

- Si  
 No  
 No sabe  
 Se rehúsa a responder

Transporte

- Carro o camion?  a. Si  
 b. No  
 c. Se rehÃ©sa a responder
- Electrodomesticos
- Radio?  a. Si  
 b. No  
 c. Se rehÃ©sa a responder
- Refrigerador?  a. Si  
 b. No  
 c. Se rehÃ©sa a responder
- Lavadora?  a. Si  
 b. No  
 c. Se rehÃ©sa a responder
- Secadora?  a. Si  
 b. No  
 c. Se rehÃ©sa a responder
- Microondas?  a. Si  
 b. No  
 c. Se rehÃ©sa a responder
- Comunicacion
- Telefono fijo?  a. Si  
 b. No  
 c. Se rehÃ©sa a responder
13. Que ingresos mensuales recibe la familia?  a. Menor a Q1,000.00  
 b. Q1,001.00 a Q3,000.00  
 c. Q3,001.00 a Q5,000.00  
 d. >Q5,000.00  
 e. No sabe  
 f. Se rehÃ©sa a responder

ENCUESTADOR LEA: Ahora le hare unas preguntas sobre las fuentes de agua en su casa, materiales de construccion, y el manejo de los desechos y basura. Me gustaria comenzar haciendole unas preguntas sobre la fuente de agua potable disponible en su hogar.

15. Durante la temporada de lluvia, cual es la fuente principal de agua para tomar que usan los miembros de su hogar?

- a. Agua embotellada o agua en bolsa (agua pura)
- b. Agua de cámara cisterna
- c. Agua de lluvia recolectada - privada
- d. Agua de lluvia recolectada - pública
- e. Agua superficial (río, presa, lago, estanque, arroyo, canal, canales de riego)
- f. Agua entubada dentro de casa (chorro privado)
- g. Agua entubada que entra al patio/jardín/lote (chorro privado)
- h. Agua entubada pública (chorro público)
- i. Agua de pozo perforado privado
- j. Agua de pozo perforado público
- k. Pozo excavado protegido - privado
- l. Pozo excavado protegido - público
- m. Pozo excavado no-protegido - privado
- n. Pozo excavado no-protegido - público
- o. Nacimiento de agua protegido - privado
- p. Nacimiento de agua protegido - público
- q. Nacimiento de agua no-protegido - privado
- r. Nacimiento de agua no-protegido - público
- s. Agua de tanque pequeño
- t. Otra (especificar)
- u. No sabe

Otro

17. En la temporada seca, cual es la fuente principal de agua para tomar los miembros de su hogar? (MARQUE UNO)

- 
- a. Agua embotellada o agua en bolsa (agua pura)
  - b. Agua de cámara cisterna
  - c. Agua de lluvia recolectada - pública
  - d. Agua acarreada de tanque pequeño
  - e. Agua superficial (río, presa, lago, estanque, arroyo, canal, canales de riego)
  - f. Agua entubada dentro de casa (chorro privado)
  - g. Agua entubada que entra al patio/jardín/lote (chorro privado)
  - h. Agua entubada pública (chorro público)
  - i. Agua de pozo perforado privado
  - j. Agua de pozo perforado público
  - k. Pozo excavado protegido - privado
  - l. Pozo excavado protegido - público
  - m. Pozo excavado no-protegido - privado
  - n. Pozo excavado no-protegido - público
  - o. Nacimiento de agua protegido - privado
  - p. Nacimiento de agua protegido - público
  - q. Nacimiento de agua no-protegido - privado
  - r. Nacimiento de agua no-protegido - público
  - s. Agua de lluvia recolectada - privada
  - t. Otra (especificar)
  - u. No sabe

Otro

18. Almacena usted, el agua para tomar, en recipientes especiales solo para agua?

- a. Si
- b. No
- c. No sabe
- d. Se resista a responder

19. Como almacena los recipientes cuando estan llenos con agua?

- a. Tapados
- b. Destapados

20. En donde se almacena los recipientes cuando estan llenos con agua?

- a. Dentro de la casa
- b. Afuera de la casa

21. Como almacena los recipientes cuando estan vacios?

- a. Tapado  
 b. Destapado

22. En donde se almacena los recipientes cuando estan vacios?

- a. Dentro de la casa  
 b. Afuera de la casa

23. Lava el recipiente antes de usarlo?

- a. SÃ-  
 b. No  
 c. No sabe  
 d. Se rehÃosa a responder

24. Como lava el recipiente? (marque los que aplican)

- a. Con agua y jabÃn  
 b. Ãnicamente con desinfectante (ej.: cloro)  
 c. Con agua, jabÃn y desinfectante  
 d. Hervir el recipiente  
 e. No sabe  
 f. Se rehÃosa a responder

25. Le hace usted algun tratamiento al agua antes de tomarla?

- a. SÃ-  
 b. No  
 c. No sabe  
 d. Se rehÃosa a responder

26. Que le hace al agua? (Solamente marque mas de una respuesta si se usan varios metodos a la vez, por ejemplo, filtracion y cloracion)

- a. Hervir  
 b. Agrega cloro  
 c. Agrega yodo  
 d. La cuele a travÃs de una tela  
 e. Usa un filtro de agua (cerÃmico, arena, compuesto, etc.)  
 f. DesinfecciÃn solar / SODIS  
 g. Deja el agua reposar  
 h. Agrega lana/floculante  
 i. Otro (especificar)  
 j. No sabe  
 k. Se rehÃosa a responder

Otro

27. Cuando fue la ultima vez que usted trato el agua para tomar usando este metodo? (MARQUE UNO)

- a. Hoy  
 b. Ayer  
 c. Hace mÃis de un dÃa, pero menos de una semana  
 d. De una a cuatro semanas  
 e. Hace mÃis de un mes  
 f. Otra(especificar)  
 g. No sabe/ no recuerda  
 h. Se rehÃosa a responder

Otro

28. Con que frecuencia le da usted tratamiento al agua para tomar usando este metodo? (MARQUE UNO)

- a. Siempre (para toda el agua que se toma en la casa)  
 b. Algunas veces  
 c. No sabe/ no recuerda  
 d. Se rehÃosa a responder

29. Usa usted el agua del rio en su casa?

- a. Si  
 b. No  
 c. No sabe  
 d. Se rehÃosa a responder  
 e. No aplica, no hay rÃo cercano

30. Para que se usa el agua del rio en su casa?  
(seleccionar todos los que aplican)

- a. Cocinar  
 b. Lavar utensilios de cocina  
 c. Lavar ropa  
 d. Bañarse  
 e. Regar jardines  
 f. No sabe  
 g. Se rehúsa a responder

31. Que tipo de sanitario tiene? (indicar cual usan con mas frecuencia los miembros de su familia)  
(MARQUE UNO)

- a. Inodoro con jalador de agua/donde se echa agua  
 b. Letrina de pozo/Hoyo de letrina con losa  
 c. Letrina de pozo sin losa/abierta/Pozo ciego  
 d. No tienen facilidades (defecación al aire libre)  
 e. Compostaje / inodoro seco o letrina abonera  
 f. Servicio o cubeta (donde las heces se eliminan manualmente)  
 g. Letrina de hoyo mejorada y ventilada (VIP)  
 h. Un sanitario compartido  
 i. Inodoro suspendido / letrina colgante  
 j. Otra  
 k. No sabe  
 l. Se rehúsa a responder

Otro

32. Cuando jala o echa agua en el inodoro o letrina  
A donde van los desechos? (MARQUE UNO)

- a. Drenaje en el sistema de desagüe con tubería  
 b. Drenaje en tanque de la fosa séptica  
 c. Va al pozo de la letrina  
 d. No hay drenaje (a flor de tierra)  
 e. Drenaje en cualquier otro lado  
 f. Drenaje en un sitio desconocido/no está seguro/no sabe en donde  
 g. No sabe  
 h. Otro

Otro

33. En donde esta ubicado el inodoro/letrina?  
(MARQUE UNO)

- a. Adentro o a la par de la casa  
 b. Afuera del lote  
 c. No sabe  
 d. Se rehúsa a responder  
 e. Otro

Otro

34. Comparten el inodoro/letrina con otros hogares?

- a. Si  
 b. No  
 c. No sabe  
 d. Se rehúsa a responder

35. Su inodoro es de uso comunitario (lo alquila)?

- a. Sí  
 b. No  
 c. No sabe  
 d. Se rehúsa a responder

36. Limpia (en alguna ocasion) el inodoro/letrina?

- a. Sí  
 b. No  
 c. No sabe  
 d. Se rehúsa a responder

37. Cuando fue la ultima vez que limpio el inodoro?

- a. Hoy
- b. Ayer
- c. Hace más de un día, pero menos de una semana
- d. Hace 1 a 4 semanas
- e. Hace más de un mes
- f. No sabe
- g. Se rehúsa a responder

38. La ultima vez que el niño mas pequeño de este hogar defeco, como desecharon las heces? (MARQUE UNO)

- a. El niño usó el inodoro/letrina
- b. Se pusieron adentro del inodoro o letrina
- c. Se pusieron adentro/enjuagaron en el desagüe o zanja (o lo lavaron en la pila)
- d. Se tiraron a la basura
- e. Se enterraron
- f. Se dejaron en el patio al aire libre
- g. Se dejaron afuera del lote al aire libre
- h. Otro
- i. No sabe
- j. Se rehúsa a responder

Otro

39. Observar. De que material esta principalmente construido el piso de la casa?

- a. Piso natural- tierra/arena
- b. Piso terminado- cerámico
- c. Piso terminado- cemento o concreto
- d. Piso natural- paja/aserrín
- e. Piso rudimentario- tablas de madera
- f. Piso rudimentario- palma/bambú
- g. Piso terminado- parquet o madera pulida
- h. Piso terminado- alfombra
- i. Otro, especificar

Otro

40. Observar: Hay excremento de algun animal en el piso de la casa?

- a. Sí
- b. No
- c. No es posible determinar

41. Observar. Cual es el material principal del techo de la casa?

- a. Techo terminado- metal de lámina
- b. Techo terminado- cemento/concreto
- c. Techo terminado- teja
- d. No hay techo
- e. Techo natural- paja/hoja de palma
- f. Techo natural- cásped
- g. Techo rudimentario- tapeteástico Techo rudimentario- palma/bambú
- h. Techo rudimentario- tablas de madera
- i. Techo rudimentario- cartón/cartón piedra
- j. Techo terminado- madera
- k. Techo terminado- calamina/fibra de cemento
- l. Techo terminado- ladrillos de cerámica
- m. Techo terminado- plástico
- n. Otro. especificar

Otro

42. Observar. Cual es el material principal de las paredes de la casa?

- a. Paredes terminadas - bloques de cemento  
 b. Paredes terminadas - adobe cubierto  
 c. Paredes rudimentarios- adobe descubierto  
 d. Sin paredes  
 e. Paredes naturales- CAÑ'A/HOJA DE PALMA/TRONCOS  
 f. Paredes naturales- Lodo  
 g. Paredes rudimentarios- ladrillos de lodo  
 h. Paredes rudimentarios- BambÃº con lodo  
 i. Paredes rudimentarios- piedra con lodo  
 j. Paredes rudimentarios- plywood  
 k. Paredes rudimentarios- cartÃ³n/cartÃ³n piedra  
 l. Paredes rudimentarios- madera reusada  
 m. Paredes terminadas- cemento o concreto  
 n. Paredes terminadas - piedra con cal  
 o. Paredes terminadas - ladrillos  
 p. Paredes terminadas - tablas de madera  
 q. Otro, especificar

Otro

\_\_\_\_\_

43. Cuantas casas (contadas por cocinas) hay atras de la puerta principal?

\_\_\_\_\_

44. Cuantos cuartos para dormir tiene la casa del representante?

\_\_\_\_\_

45. La cocina esta fisicamente separada de los cuartos utilizados para dormir?

- a. Si  
 b. No

46. Que hace con la basura en su hogar? (puede escoger mas de uno)

- a. La quema  
 b. Se utiliza como "combustible" para cocinar  
 c. La recicla  
 d. La entierra  
 e. La colectan para llevarla al basurero general  
 f. La colectan para llevarla al relleno  
 g. La colectan para llevarla al barranco  
 h. No sabe  
 i. Otro  
 j. Se rehÃºsa a responder

Otro

\_\_\_\_\_

47. Usa usted una estufa de leÃ±a, gas o ambos para cocinar?

- a. LeÃ±a  
 b. Gas  
 c. Ambos  
 d. Ninguno  
 e. No sabe  
 f. Se rehÃºsa a responder

48. Si usa una estufa de leÃ±a, que tipo de estufa es la que usa por lo general para cocinar? (MARQUE UNO)

- a. Estufa de chimenea (la plancha)  
 b. Estufa de fuego abierto  
 c. Otra(especificar)  
 d. No sabe  
 e. Se rehÃºsa a responder

Otro

\_\_\_\_\_

49. Lavan los utensilios de cocina antes de usarlos?

- a. SÃ-  
 b. No  
 c. No sabe  
 d. Se rehÃºsa a responder

Otro \_\_\_\_\_

50. Como lava los utensilios? (marque los que aplican)

- a. Con agua y jab n  
 b.  nicamente con desinfectante (ej.: cloro)  
 c. Con agua, jab n y desinfectante  
 d. Hervir los utensilios  
 e. Otro  
 f. No sabe  
 g. Se reh sa a responder

51. Cual es la edad aproximada de la persona que normalmente lava los trastos?

- a. 0-5 a os  
 b. 6-12 a os  
 c. 13-18 a os  
 d. 19 a os en adelante  
 e. No sabe  
 f. Se reh sa a responder

---

**ENCUESTADOR LEA: Ahora me gustar a preguntarle sobre los h bitos de higiene en el hogar. Estas preguntas tienen que ver principalmente con el lavado de manos en su hogar.**

52. Por favor mencione todos los sitios en donde los miembros de su familia pudieron lavarse las manos en las  ltimas dos semanas (MARQUE TODOS LOS QUE APLIQUEN)

- a. Sitio en o cerca del inodoro adentro de la casa  
 b. Sitio en o cerca de la cocina dentro del lote o terreno  
 c. Sitio cerca del corral de animales  
 d. En cualquier lugar dentro del lote  
 e. Afuera del lote  
 f. Otro  
 g. Nunca se lava las manos/no hay lugar donde hacerlo  
 h. No sabe  
 i. Se reh sa a responder

Otro \_\_\_\_\_

---

**Secci n 3 ENCUESTADOR LEA: Muchas gracias por su tiempo. Ahora quiero hacerle unas preguntas sobre varias condiciones en su hogar. Estas preguntas las hacemos en cada casa que visitamos.**

### **ANIMALES FUERA DE LA CASA**

53. Los miembros de su familia tienen animales que viven libremente afuera de la casa? (MARQUE UNO)

- a. Si  
 b. No  
 d. Se reh sa a responder



54. Que animales tienen? (MARQUE TODAS LAS QUE APLIQUEN, INDICAR CUANTOS ANIMALES DE CADA TIPO)

- a. Perros  
 b. Gatos  
 c. Pollos  
 d. Pavos  
 e. Patos  
 f. Gansos  
 g. Otros p  jaros  
 h. Cerdos  
 i. Vacas  
 j. Ovejas  
 k. Cabras  
 l. Otros animales, especificar  
 m. No sabe  
 n. Se reh  sa a responder

Cual otro animal? \_\_\_\_\_

---



---

## PERROS

Cuantos Perros? \_\_\_\_\_

Alguna vez les ha dado antibioticos a su/sus perro/perros?

- a. Si  
 b. No  
 c. No sabe  
 d. Se reh  sa a responder

DATOS MEDICINA PERROS

Nombre de la Medicina/Antibiotico \_\_\_\_\_

  c Medicina a la vista y se puede leer el nombre

- Si  
 No

  c Caja de la medicina o botella vista (si/no)

- Si  
 No

Alguna vez ha dejado de comer o tomar leche/carne/huevos del animal indicado, despu  s de darle antibi  ticos?

- SI  
 No

Durante cuanto tiempo ha dejado de tomarla? (solo aplica si dice que si a la pregunta anterior)  
(Numero de d  as) \_\_\_\_\_

---



---

## GATOS

Cuantos Gatos? \_\_\_\_\_

Alguna vez les ha dado antibioticos a su/sus gato/gatos?

- a. Si  
 b. No  
 c. No sabe  
 d. Se reh  sa a responder

DATOS MEDICINA GATOS

Nombre de la Medicina/Antibiotico \_\_\_\_\_

¿ Medicina a la vista y se puede leer el nombre

- Si  
 No

¿ Caja de la medicina o botella vista (si/no)

- Si  
 No

Alguna vez ha dejado de comer o tomar  
leche/carne/huevos del animal indicado, después  
de darle antibióticos?

- SI  
 No

Durante cuanto tiempo ha dejado de tomarla? (solo  
aplica si dice que si a la pregunta anterior)  
(Numero de días)

\_\_\_\_\_

---



---

## PAVOS

Cuantos Pavos?

\_\_\_\_\_

Alguna vez les ha dado antibioticos a su/sus  
pavo/pavos?

- a. Si  
 b. No  
 c. No sabe  
 d. Se rehúsa a responder

DATOS MEDICINA PAVOS

Nombre de la Medicina/Antibiotico

\_\_\_\_\_

¿ Medicina a la vista y se puede leer el nombre

- Si  
 No

¿ Caja de la medicina o botella vista (si/no)

- Si  
 No

Alguna vez ha dejado de comer o tomar  
leche/carne/huevos del animal indicado, después  
de darle antibióticos?

- SI  
 No

Durante cuanto tiempo ha dejado de tomarla? (solo  
aplica si dice que si a la pregunta anterior)  
(Numero de días)

\_\_\_\_\_

---



---

## POLLOS

Cuantos Pollos?

\_\_\_\_\_

Alguna vez les ha dado antibioticos a su/sus  
pollo/pollos?

- a. Si  
 b. No  
 c. No sabe  
 d. Se rehúsa a responder

DATOS MEDICINA POLLOS

Nombre de la Medicina/Antibiotico

\_\_\_\_\_

¿ Medicina a la vista y se puede leer el nombre

- Si  
 No

¿ Caja de la medicina o botella vista (si/no)

- Si  
 No

Alguna vez ha dejado de comer o tomar leche/carne/huevos del animal indicado, después de darle antibióticos?

- SI  
 No

Durante cuanto tiempo ha dejado de tomarla? (solo aplica si dice que si a la pregunta anterior)  
(Numero de días)

\_\_\_\_\_

## PATOS

Cuantos Patos?

\_\_\_\_\_

Alguna vez les ha dado antibioticos a su/sus pato/patos?

- a. Si  
 b. No  
 c. No sabe  
 d. Se rehúsa a responder

DATOS MEDICINA PATOS

Nombre de la Medicina/Antibiotico

\_\_\_\_\_

¿ Medicina a la vista y se puede leer el nombre

- Si  
 No

¿ Caja de la medicina o botella vista (si/no)

- Si  
 No

Alguna vez ha dejado de comer o tomar leche/carne/huevos del animal indicado, después de darle antibióticos?

- SI  
 No

Durante cuanto tiempo ha dejado de tomarla? (solo aplica si dice que si a la pregunta anterior)  
(Numero de días)

\_\_\_\_\_

## GANSOS

Cuantos Gansos?

\_\_\_\_\_

Alguna vez les ha dado antibioticos a su/sus ganso/gansos?

- a. Si  
 b. No  
 c. No sabe  
 d. Se rehúsa a responder

DATOS MEDICINA GANSOS

Nombre de la Medicina/Antibiotico

\_\_\_\_\_

¿ Medicina a la vista y se puede leer el nombre

- Si  
 No

¿Caja de la medicina o botella vista (si/no)

- Si  
 No

Alguna vez ha dejado de comer o tomar leche/carne/huevos del animal indicado, después de darle antibióticos?

- SI  
 No

Durante cuanto tiempo ha dejado de tomarla? (solo aplica si dice que si a la pregunta anterior)  
(Numero de días)

\_\_\_\_\_

## PAJAROS

Cuantos otros pajaros?

\_\_\_\_\_

Alguna vez les ha dado antibioticos a su/sus pajaros/pajaros?

- a. Si  
 b. No  
 c. No sabe  
 d. Se rehúsa a responder

### DATOS MEDICINA PAJAROS

Nombre de la Medicina/Antibiotico

\_\_\_\_\_

¿Caja de la medicina a la vista y se puede leer el nombre

- Si  
 No

¿Caja de la medicina o botella vista (si/no)

- Si  
 No

Alguna vez ha dejado de comer o tomar leche/carne/huevos del animal indicado, después de darle antibióticos?

- SI  
 No

Durante cuanto tiempo ha dejado de tomarla? (solo aplica si dice que si a la pregunta anterior)  
(Numero de días)

\_\_\_\_\_

## CERDOS

Cuantos Cerdos?

\_\_\_\_\_

Alguna vez les ha dado antibioticos a su/sus cerdo/cerdos?

- a. Si  
 b. No  
 c. No sabe  
 d. Se rehúsa a responder

### DATOS MEDICINA CERDOS

Nombre de la Medicina/Antibiotico

\_\_\_\_\_

¿Caja de la medicina a la vista y se puede leer el nombre

- Si  
 No

¿Caja de la medicina o botella vista (si/no)

- Si  
 No

Alguna vez ha dejado de comer o tomar leche/carne/huevos del animal indicado, después de darle antibióticos?

- SI  
 No

Durante cuanto tiempo ha dejado de tomarla? (solo aplica si dice que si a la pregunta anterior)  
(Numero de días)

\_\_\_\_\_

## VACAS

Cuantos Vacas?

\_\_\_\_\_

Alguna vez les ha dado antibioticos a su/sus vaca/vacas?

- a. Si  
 b. No  
 c. No sabe  
 d. Se rehúsa a responder

DATOS MEDICINA VACAS

Nombre de la Medicina/Antibiotico

\_\_\_\_\_

¿Medicina a la vista y se puede leer el nombre

- Si  
 No

¿Caja de la medicina o botella vista (si/no)

- Si  
 No

Alguna vez ha dejado de comer o tomar leche/carne/huevos del animal indicado, después de darle antibióticos?

- SI  
 No

Durante cuanto tiempo ha dejado de tomarla? (solo aplica si dice que si a la pregunta anterior)  
(Numero de días)

\_\_\_\_\_

## CABRAS

Cuantos Cabras?

\_\_\_\_\_

Alguna vez les ha dado antibioticos a su/sus cabra/cabras?

- a. Si  
 b. No  
 c. No sabe  
 d. Se rehúsa a responder

DATOS MEDICINA CABRAS

Nombre de la Medicina/Antibiotico

\_\_\_\_\_

¿Medicina a la vista y se puede leer el nombre

- Si  
 No

¿Caja de la medicina o botella vista (si/no)

- Si  
 No

Alguna vez ha dejado de comer o tomar leche/carne/huevos del animal indicado, después de darle antibióticos?

- SI  
 No

Durante cuanto tiempo ha dejado de tomarla? (solo aplica si dice que si a la pregunta anterior)  
(Numero de días)

\_\_\_\_\_

## OVEJAS

Cuantos Ovejas?

\_\_\_\_\_

Alguna vez les ha dado antibioticos a su/sus oveja/ovejas?

- a. Si  
 b. No  
 c. No sabe  
 d. Se rehúsa a responder

### DATOS MEDICINA OVEJAS

Nombre de la Medicina/Antibiotico

\_\_\_\_\_

¿Medicina a la vista y se puede leer el nombre

- Si  
 No

¿Caja de la medicina o botella vista (si/no)

- Si  
 No

Alguna vez ha dejado de comer o tomar leche/carne/huevos del animal indicado, después de darle antibióticos?

- SI  
 No

Durante cuanto tiempo ha dejado de tomarla? (solo aplica si dice que si a la pregunta anterior)  
(Numero de días)

\_\_\_\_\_

a. Otros animales, especificar la cantidad

\_\_\_\_\_

## OTROS ANIMALES

Alguna vez les ha dado antibioticos a sus otros animales?

- a. Si  
 b. No  
 c. No sabe  
 d. Se rehúsa a responder

### DATOS MEDICINA OTROS ANIMALES

Nombre de la Medicina/Antibiotico

\_\_\_\_\_

¿Medicina a la vista y se puede leer el nombre

- Si  
 No

¿Caja de la medicina o botella vista (si/no)

- Si  
 No

Alguna vez ha dejado de comer o tomar leche/carne/huevos del animal indicado, despu s de darle antibi ticos?

- SI  
 No

Con que frecuencia les da esta medicina a sus animales? (Numero de veces al a o)

\_\_\_\_\_

57. Tiene algun animal que vive adentro de la casa?

- a. Si  
 b. No

58. Por favor indique el tipo y numero de animales que viven libremente adentro de la casa. (MARQUE TODOS LOS QUE APLIQUEN indicando cantidad)

- a. Perros  
 b. Gatos  
 c. Pollos  
 d. Pavos  
 e. Patos  
 f. Gansos  
 g. Otros p jaros  
 h. Cerdos  
 i. Vacas  
 j. Ovejas  
 k. Cabras  
 a. Otros animales, especificar  
 b. No sabe  
 c. Se reh sa a responder

Cual otro animal?

\_\_\_\_\_

## PERROS

Cuantos Perros?

\_\_\_\_\_

Alguna vez les ha dado antibioticos a su/sus perro/perros?

- a. Si  
 b. No  
 c. No sabe  
 d. Se reh sa a responder

### DATOS MEDICINA PERROS

Nombre de la Medicina/Antibiotico

\_\_\_\_\_

  Medicina a la vista y se puede leer el nombre

- Si  
 No

  Caja de la medicina o botella vista (si/no)

- Si  
 No

Alguna vez ha dejado de tomar la leche o comer la carne del animal indicado, despues de darle antibioticos?

- SI  
 No

Durante cuanto tiempo ha dejado de tomarla? (solo aplica si dice que si a la pregunta anterior) (Numero de d as)

\_\_\_\_\_

**GATOS**

Cuantos Gatos? \_\_\_\_\_

Alguna vez les ha dado antibioticos a su/sus gato/gatos?

- a. Si  
 b. No  
 c. No sabe  
 d. Se reh sa a responder

**DATOS MEDICINA GATOS**

Nombre de la Medicina/Antibiotico \_\_\_\_\_

   Medicina a la vista y se puede leer el nombre

- Si  
 No

   Caja de la medicina o botella vista (si/no)

- Si  
 No

Alguna vez ha dejado de tomar la leche o comer la carne del animal indicado, despues de darle antibioticos?

- SI  
 No

Durante cuanto tiempo ha dejado de tomarla? (solo aplica si dice que si a la pregunta anterior)  
(Numero de d s) \_\_\_\_\_

**PAVOS**

Cuantos Pavos? \_\_\_\_\_

Alguna vez les ha dado antibioticos a su/sus pavo/pavos?

- a. Si  
 b. No  
 c. No sabe  
 d. Se reh sa a responder

**DATOS MEDICINA PAVOS**

Nombre de la Medicina/Antibiotico \_\_\_\_\_

   Medicina a la vista y se puede leer el nombre

- Si  
 No

   Caja de la medicina o botella vista (si/no)

- Si  
 No

Alguna vez ha dejado de tomar la leche o comer la carne del animal indicado, despues de darle antibioticos?

- SI  
 No

Durante cuanto tiempo ha dejado de tomarla? (solo aplica si dice que si a la pregunta anterior)  
(Numero de d s) \_\_\_\_\_



---

---

**POLLOS**

Cuantos Pollos? \_\_\_\_\_

Alguna vez les ha dado antibioticos a su/sus pollo/pollos?

- a. Si  
 b. No  
 c. No sabe  
 d. Se reh sa a responder

**DATOS MEDICINA POLLOS**

Nombre de la Medicina/Antibiotico \_\_\_\_\_

   Medicina a la vista y se puede leer el nombre

- Si  
 No

   Caja de la medicina o botella vista (si/no)

- Si  
 No

Alguna vez ha dejado de tomar la leche o comer la carne del animal indicado, despues de darle antibioticos?

- SI  
 No

Durante cuanto tiempo ha dejado de tomarla? (solo aplica si dice que si a la pregunta anterior)  
(Numero de d as) \_\_\_\_\_

---

---

**PATOS**

Cuantos Patos? \_\_\_\_\_

Alguna vez les ha dado antibioticos a su/sus pato/patos?

- a. Si  
 b. No  
 c. No sabe  
 d. Se reh sa a responder

**DATOS MEDICINA PATOS**

Nombre de la Medicina/Antibiotico \_\_\_\_\_

   Medicina a la vista y se puede leer el nombre

- Si  
 No

   Caja de la medicina o botella vista (si/no)

- Si  
 No

Alguna vez ha dejado de tomar la leche o comer la carne del animal indicado, despues de darle antibioticos?

- SI  
 No

Durante cuanto tiempo ha dejado de tomarla? (solo aplica si dice que si a la pregunta anterior)  
(Numero de d as) \_\_\_\_\_

**GANSOS**

Cuantos Gansos? \_\_\_\_\_

Alguna vez les ha dado antibioticos a su/sus ganso/gansos?

- a. Si  
 b. No  
 c. No sabe  
 d. Se reh sa a responder

**DATOS MEDICINA GANSOS**

Nombre de la Medicina/Antibiotico \_\_\_\_\_

   Medicina a la vista y se puede leer el nombre

- Si  
 No

   Caja de la medicina o botella vista (si/no)

- Si  
 No

Alguna vez ha dejado de tomar la leche o comer la carne del animal indicado, despues de darle antibioticos?

- SI  
 No

Durante cuanto tiempo ha dejado de tomarla? (solo aplica si dice que si a la pregunta anterior)  
(Numero de d as) \_\_\_\_\_

**PAJAROS**

Cuantos otros pajaros? \_\_\_\_\_

Alguna vez les ha dado antibioticos a su/sus pajaro/pajaros?

- a. Si  
 b. No  
 c. No sabe  
 d. Se reh sa a responder

**DATOS MEDICINA PAJAROS**

Nombre de la Medicina/Antibiotico \_\_\_\_\_

   Medicina a la vista y se puede leer el nombre

- Si  
 No

   Caja de la medicina o botella vista (si/no)

- Si  
 No

Alguna vez ha dejado de tomar la leche o comer la carne del animal indicado, despues de darle antibioticos?

- SI  
 No

Durante cuanto tiempo ha dejado de tomarla? (solo aplica si dice que si a la pregunta anterior)  
(Numero de d as) \_\_\_\_\_

---

---

**CERDOS**

Cuantos Cerdos? \_\_\_\_\_

Alguna vez les ha dado antibioticos a su/sus cerdo/cerdos?

- a. Si  
 b. No  
 c. No sabe  
 d. Se reh sa a responder

**DATOS MEDICINA CERDOS**

Nombre de la Medicina/Antibiotico \_\_\_\_\_

   Medicina a la vista y se puede leer el nombre

- Si  
 No

   Caja de la medicina o botella vista (si/no)

- Si  
 No

Alguna vez ha dejado de tomar la leche o comer la carne del animal indicado, despues de darle antibioticos?

- SI  
 No

Durante cuanto tiempo ha dejado de tomarla? (solo aplica si dice que si a la pregunta anterior)  
(Numero de d as) \_\_\_\_\_

---

---

**VACAS**

Cuantos Vacas? \_\_\_\_\_

Alguna vez les ha dado antibioticos a su/sus vaca/vacas?

- a. Si  
 b. No  
 c. No sabe  
 d. Se reh sa a responder

**DATOS MEDICINA VACAS**

Nombre de la Medicina/Antibiotico \_\_\_\_\_

   Medicina a la vista y se puede leer el nombre

- Si  
 No

   Caja de la medicina o botella vista (si/no)

- Si  
 No

Alguna vez ha dejado de tomar la leche o comer la carne del animal indicado, despues de darle antibioticos?

- SI  
 No

Durante cuanto tiempo ha dejado de tomarla? (solo aplica si dice que si a la pregunta anterior)  
(Numero de d as) \_\_\_\_\_

**CABRAS**

Cuantos Cabras? \_\_\_\_\_

Alguna vez les ha dado antibioticos a su/sus  
cabra/cabras?

- a. Si  
 b. No  
 c. No sabe  
 d. Se reh sa a responder

**DATOS MEDICINA CABRAS**

Nombre de la Medicina/Antibiotico \_\_\_\_\_

   Medicina a la vista y se puede leer el nombre

- Si  
 No

   Caja de la medicina o botella vista (si/no)

- Si  
 No

Alguna vez ha dejado de tomar la leche o comer la  
carne del animal indicado, despues de darle  
antibioticos?

- SI  
 No

Durante cuanto tiempo ha dejado de tomarla? (solo  
aplica si dice que si a la pregunta anterior)  
(Numero de d as) \_\_\_\_\_

**OVEJAS**

Cuantos Ovejas? \_\_\_\_\_

Alguna vez les ha dado antibioticos a su/sus  
oveja/ovejas?

- a. Si  
 b. No  
 c. No sabe  
 d. Se reh sa a responder

**DATOS MEDICINA OVEJAS**

Nombre de la Medicina/Antibiotico \_\_\_\_\_

   Medicina a la vista y se puede leer el nombre

- Si  
 No

   Caja de la medicina o botella vista (si/no)

- Si  
 No

Alguna vez ha dejado de tomar la leche o comer la  
carne del animal indicado, despues de darle  
antibioticos?

- SI  
 No

Durante cuanto tiempo ha dejado de tomarla? (solo  
aplica si dice que si a la pregunta anterior)  
(Numero de d as) \_\_\_\_\_

a. Otros animales, especificar la cantidad \_\_\_\_\_

---



---

## OTROS ANIMALES

Alguna vez les ha dado antibioticos a sus otros animales?

- a. Si  
 b. No  
 c. No sabe  
 d. Se reh sa a responder

### DATOS MEDICINA OTROS ANIMALES

Nombre de la Medicina/Antibiotico \_\_\_\_\_

  Medicina a la vista y se puede leer el nombre

- Si  
 No

  Caja de la medicina o botella vista (si/no)

- Si  
 No

Alguna vez ha dejado de tomar la leche o comer la carne del animal indicado, despues de darle antibioticos?

- SI  
 No

Con que frecuencia les da esta medicina a sus animales? (Numero de veces al a o) \_\_\_\_\_

59. Los animales a veces se quedan dentro de los cuartos en donde duermen los miembros de la familia(ya sea de dia o de noche)? (MARQUE UNO)

- a. Si  
 b. No  
 c. No sabe  
 d. Se reh sa a responder

i. Ovejas \_\_\_\_\_

60. Por favor indique Que animales se quedan a veces adentro de los cuartos donde duermen miembros de la familia (ya sea de noche o de dia)?

- a. Perros  
 b. Gatos  
 c. Pollos  
 d. Pavos  
 e. Gansos  
 f. Otros p jaros  
 g. Cerdos  
 h. Vacas  
 i. Ovejas  
 j. Cabras  
 k. Otros, especificar  
 l. No sabe  
 m. Reh sa

a. Perros \_\_\_\_\_

b. Gatos \_\_\_\_\_

d. Pavos \_\_\_\_\_

g. Cerdos \_\_\_\_\_

c. Pollos \_\_\_\_\_

e. Gansos \_\_\_\_\_

h. Vacas \_\_\_\_\_

- f. Otros pajaros \_\_\_\_\_
- i. Ovejas \_\_\_\_\_
- j. Cabras \_\_\_\_\_
- k. Otros, especificar \_\_\_\_\_

---



---

## SECCIÃ“N ALIMENTOS

61. Ustedes comen carne?
- a. Si  
 b. No  
 c. No sabe  
 d. Se rehÃ“sa a responder
62. Que tipo de carne? (Puede seleccionar mas de una)
- a. Pollo  
 b. Carne de cerdo  
 c. Carne de res  
 d. Pescado  
 e. Conejo  
 f. Chompipe  
 g. Pato  
 h. Otro, indique  
 i. No sabe  
 j. Se rehÃ“sa a responder
- Otro \_\_\_\_\_
63. Indique la procedencia de cada tipo de carne
- a. Criado en la casa  
 b. Comprado en el mercado  
 c. Comprado en el supermercado  
 d. Comprado en la despensa  
 e. Comprado en la tienda  
 f. Otro, especificar  
 g. No sabe  
 h. Se rehÃ“sa a responder
- Otro \_\_\_\_\_
64. Ustedes toman leche?
- a. Si  
 b. No  
 c. No sabe  
 d. Se rehÃ“sa a responder
65. Que tipo de leche toman? (MARQUE TODOS LOS QUE APLIQUEN)
- a. Leche de vaca (en fresco)  
 b. Leche en polvo  
 c. Leche en caja  
 d. Leche de cabra (en fresco)  
 e. Leche en bolsa  
 f. Otro
66. Hierve la leche antes de tomarla?
- a. Si  
 b. No  
 c. No sabe  
 d. Se rehÃ“sa a responder
67. Cuanta leche hervida toma por semana? (numero de vasos enteros)
- \_\_\_\_\_
- Otro \_\_\_\_\_

68. Cuanta leche no hervida se toma por semana (numero de vasos enteros)?

---

69. Cuanta leche comprada en la tienda/supermercado toma por semana? (numero de vasos enteros)

---

70. Usted guarda la leche?

- a. Si
- b. No

71. En donde guarda la leche?

- a. En la refri
- b. Sin refrigeraci3n
- c. No sabe
- d. Se reh4sa a responder

72. En que tipo de recipiente guarda la leche?

- a. En su recipiente original desechable (comprado en la tienda/supermercado)
- b. Pl4stico
- c. Metal
- d. Vidrio
- e. Bolsa
- f. No sabe
- g. Se reh4sa a responder

73. Es un recipiente especifico para la leche?

- a. Si
- b. No
- c. No sabe
- d. Se reh4sa a responder

74. Lava el recipiente antes de agregarle la leche?

- a. Si
- b. No
- c. No sabe
- d. Se reh4sa a responder

75. Como lava el recipiente? (marque los que aplican)

- a. Con agua y jab4n
- b. 4nicamente con desinfectante (ej: cloro)
- c. Con agua, jab4n y desinfectante
- d. Hervir el recipiente
- e. No sabe
- f. Se reh4sa a responder

# Cuestionario Adultos

---



---

## Preguntas de tamizaje - para adulto que dar i la muestra

1. Usted ha vivido en la casa durante por lo menos un a o?  
 a. S -  
 b. No
2. Usted vivira en la misma casa por lo menos un a o mas?  
 a. S -  
 b. No
3. Usted esta enfermo el dia de hoy con diarrea, fiebre aguda o una enfermedad respiratoria?  
 a. S - Finalizado  
 b. No
4. Usted esta tomando algun medicamento el dia de hoy?  
 a. S -  
 b. No
5. Nos puede ense ar que medicamento esta tomando?  
 a. S -  
 b. No, no lo puede mostrar
- 5.1 Nos puede decir cual medicamento esta tomando?  
 a. S -  
 b. No, no lo puede decir. Finalizado.
- " El encuestador debe verificar si se trata de un antibi tico o no. Puede ayudarse con el  ilbum de medicamentos o, en el caso de dificultad, llamando a Brooke o a Puri"
6. Es un antibi tico lo que est i tomando el adulto en el d a de hoy?  
 a. S -, Finalizado  
 b. No - proceder al consentimiento informado
- ELEGIBLE O NO \_\_\_\_\_
7. Usted dio su consentimiento informado?  
 a. S -  
 b. No- Finalizado

---



---

## Cuestionario para la Evaluaci n comunitaria de Escherichia coli resistente a los antibi ticos en Quetzaltenango; Guatemala

### INFORMACI N DEMOGR FICA del adulto

1. Codigo/identificacion (xxx-xx) \_\_\_\_\_
- Latitud \_\_\_\_\_
- Longitud \_\_\_\_\_
2. Localidad  
 Coatepeque  
 San Juan Ostuncalco
- a. Coatepeque (listado definido de opciones)  
 a. El Jardin  
 b. La Union
- b. San Juan Ostuncalco (listado definido de opciones)  
 1.Casco Urbano  
 2.Monrovia
3. Sexo  
 a. Masculino  
 b. Femenino



4. Cuantos años tiene? (anotar # años completos)

\_\_\_\_\_

5. De que etnia se considera usted?

- a. Indígena  
 b. Ladino  
 c. Otro. Especificar.  
 d. Desconocido  
 e. Se rehúsa a responder

Otro

\_\_\_\_\_

6. Si se identifica como indígena, A cual grupo etnico pertenece usted?

- a. Maya  
 b. Xinca  
 c. Ladino  
 d. Garífuna  
 e. Mestizo  
 f. Otro  
 g. Se rehúsa a responder

Otro

\_\_\_\_\_

7. Sabe usted leer y escribir?

- a. Si  
 b. No  
 c. Se rehúsa a responder

8. Cuál fue el nivel académico que usted completó?

- a. Ninguna educación formal (no fue al colegio)  
 b. No completó educación primaria  
 c. Completó educación primaria  
 d. Completó educación secundaria  
 e. Completó educación mayor a la secundaria  
 f. Otro  
 g. No quiere responder

8.1 ¿Cuál fue el nivel académico que usted completó?

\_\_\_\_\_

9. Con que frecuencia toma alcohol?

- a. No toma alcohol  
 b. De vez en cuando (ocasional)  
 c. Mensual  
 d. Semanal  
 e. Diario  
 f. No quiere responder

---

## I. Prácticas en la Vivienda: Lavado de manos

**ENCUESTADOR LEA: Ahora me gustaría preguntarle sobre los hábitos de higiene en el hogar. Estas preguntas tienen que ver principalmente con el lavado de manos en su hogar.**

10. Se ha lavado las manos con agua por cualquier razón el día de hoy? MARQUE UNO

- a. Si  
 b. No  
 c. No sabe  
 d. Se rehúsa a responder

11. De que fuente salio el agua con la que se lavo las manos?

- a. Casi siempre agua del chorro  
 b. Usó siempre agua de un bote  
 c. Otra fuente de agua  
 d. No sabe  
 e. Se rehúsa a responder

11. 1 Otra fuente de agua

\_\_\_\_\_

12. Uso jabon?

- a. SÃ-
- b. No
- c. No sabe
- d. Se rehÃsa a responder

---

## II. Historia de uso antibiÃtico

**En la siguiente secciÃn de la encuesta le preguntaremos sobre el uso de medicamentos, especialmente, el uso de antibiÃticos. Los antibiÃticos se definen como medicamentos usados para matar las bacterias**

13. Ha tomado antibioticos alguna vez?

- a. Si
- b. No
- c. No sabe
- d. Se rehÃsa a responder

14. Ha tomado antibioticos en los ultimos 14 dias?

- a. Si
- b. No
- c. No sabe
- d. Se rehÃsa a responder

15. La ultima vez que tomo un antibiotico, para que enfermedad lo tomo? (puede seleccionar mas de una)

- a. Nariz congestionada
- b. Tos
- c. Dolor de cabeza
- d. Fiebre
- e. VÃmitos
- f. Diarrea
- g. Heridas de la piel
- h. Malaria
- i. VIH
- j. Zika
- k. Dengue
- l. Chikungunya
- m. Tuberculosis
- n. Otro. Especificar.
- o. No Sabe
- p. Se rehÃsa a responder

Otro

16. Hablando de la enfermedad que le dio en la P15, Â¿BuscÃ algÃn tipo de atenciÃn para tratar su enfermedad?

- 
- a. SÃ- (ir a P17)
  - b. No (ir a P18)
  - c. No sabe (ir a P18)
  - d. Se rehÃsa a responder (ir a P18)

17. Donde busco atencion? (Marque todos los que apliquen)

- a. Puesto de Salud
- b. Centro de Salud
- c. Hospital P blico
- d. Hospital Privado
- e. Cl nica Privada
- f. Centro de Convergencia
- g. Trabajador de Salud
- h. Feria M dica
- i. Farmacia
- j. Tienda
- k. Curandero
- l. Miembros de la Familia y/o amigos
- m. Otros, especificar
- n. No sabe
- o. Se reh sa a responder

Otro

18.  Qu  medicamentos us  para esta enfermedad en particular (pregunte para cada enfermedad mencionada en P16). Pida ver los medicamentos si est n disponibles, y pregunte " qu  otros medicamento tom ?" hasta que ya no mencionen otros medicamentos.

- a. Antib ticos
- b. Desparasitantes
- c. Medicamentos para el dolor
- d. Medicamentos naturales
- e. Otros,
- f. No sabe
- g. Se reh sa a responder

Otro

19.  Cu ntos tipos de antib ticos ha tomado?

---



---



---



---

## 20. Para cada antib tico complete la siguiente tabla:

DATOS MEDICINA No 1  
Nombre de la medicina (1)

---

  Se examino paquete o botella (si/no)

- Si
- No

  El nombre del medicamento se puede leer

- Si
- No

Le recetaron este medicamento en un puesto/centro/clinica privada de salud?

- Si
- No
- No se
- No Responde

  Si, indique en que lugar se le receto/recomendo.

- Centro de salud MSPAS
- Puesto de salud/Cl nica privada

Si no, como sabia que medicamento comprar?

- Amigo o familiar
- Experiencia previa
- Persona en la farmacia/m dico/otro

En donde consiguio el medicamento?

- Farmacia
- Tienda
- Super
- MSPAS
- Amigo o familiar
- Comadronas
- Curanderos
- Otros

Cuantos dias tomo el medicamento?

\_\_\_\_\_

Con que frecuencia toma antibioticos?

- Cada mes
- Cada tres meses
- Cada 6 meses
- Cada año
- Cada vez que es necesario
- No sabe
- No responde

Ademas de usted, uso otra persona o animal este medicamento?

- Si
- No

Si si, que otra persona o animal uso este medicamento?

- a. Papá o Mamá
- b. Pareja
- c. Hermanos(as)
- d. Hijos
- e. Abuelos
- f. Otro parientes
- g. Animal

## Medicina 2

Nombre de la medicina

\_\_\_\_\_

Se examino paquete o botella (si/no)

- Si
- No

El nombre del medicamento se puede leer

- Si
- No

Le recetaron este medicamento en un puesto/centro/clinica privada de salud?

- Si
- No
- No se
- No Responde

Si, indique en que lugar se le receto/recomendo.

- Centro de salud MSPAS
- Puesto de salud/Clinica privada

Si no, como sabia que medicamento comprar?

- Amigo o familiar
- Experiencia previa
- Persona en la farmacia/médico/otro

En donde consiguio el medicamento?

- Farmacia
- Tienda
- Super
- MSPAS
- Amigo o familiar
- Comadronas
- Curanderos
- Otros

Cuantos dias tomo el medicamento?

\_\_\_\_\_

Con que frecuencia toma antibioticos?

- Cada mes
- Cada tres meses
- Cada 6 meses
- Cada año±o
- Cada vez que es necesario
- No sabe
- No responde

Ademas de usted, uso otra persona o animal este medicamento?

- SI
- No

â€¢ Si si, que otra persona o animal uso este medicamento?

- a. PapÃi o MamÃi
- b. Pareja
- c. Hermanos(as)
- d. Hijos
- e. Abuelos
- f. Otro parientes
- g. Animal

### Medicina 3

Nombre de la medicina

\_\_\_\_\_

â€¢ Se examino paquete o botella (si/no)

- Si
- No

â€¢ El nombre del medicamento se puede leer

- Si
- No

Le recetaron este medicamento en un puesto/centro/clinica privada de salud?

- Si
- No
- No se
- No Responde

Indique en que lugar se le receto/recomendo.

- Centro de salud MSPAS
- Puesto de salud/CIÃzÃ½nica privada

Si no, como sabia que medicamento comprar?

- Amigo o familiar
- Experiencia previa
- Persona en la farmacia/mÃzÃ½dico/otro

En donde consiguio el medicamento?

- Farmacia
- Tienda
- Super
- MSPAS
- Amigo o familiar
- Comadronas
- Curanderos
- Otros

Cuantos dias tomo el medicamento? \_\_\_\_\_

Con que frecuencia toma antibioticos?

- Cada mes
- Cada tres meses
- Cada 6 meses
- Cada año±o
- Cada vez que es necesario
- No sabe
- No responde

Ademas de usted, uso otra persona o animal este medicamento?

- SI
- No

¿ Si si, que otra persona o animal uso este medicamento?

- a. Papá o Mamá
- b. Pareja
- c. Hermanos(as)
- d. Hijos
- e. Abuelos
- f. Otro parientes
- g. Animal

---

### III. Prácticas de la vivienda incluyendo posesión de animales, métodos de cocción y dieta

20. Usted come carne?

- a. Si
- b. No
- c. No sabe
- d. Se rehúsa a responder

21. Que tipo de carne? (Puede seleccionar mas de una)

- a. Pollo
- b. Carne de cerdo
- c. Carne de res
- d. Pescado
- e. Conejo
- f. Chompipe
- g. Pato
- h. Otro, indique
- i. No sabe
- j. Se rehúsa a responder

21.1 Qué otro tipo de carne? \_\_\_\_\_

22. indique la procedencia de cada tipo de carne indicado en la P21:

- a. Criado en la casa
- b. Comprado en el mercado
- c. Comprado en el supermercado
- d. Comprado en la despensa
- e. Comprado en la tienda
- f. Otro, especificar
- g. No sabe
- h. Se rehúsa a responder

22.1 Otro

23. Usted toma leche?

- a. Si
- b. No
- c. No sabe
- d. Se rehúsa a responder

24. Que tipo de leche toma? (MARQUE TODOS LOS QUE APLIQUEN)

- a. Leche de vaca (en fresco)
- b. Leche en polvo
- c. Leche en caja
- d. Leche de cabra (en fresco)
- e. Leche en bolsa
- f. Otro

Otro

25. Trata (o prepara) de alguna forma la leche antes de tomarla?

- a. Si
- b. No
- c. No sabe
- d. Se rehúsa a responder

26. Hierve la leche antes de tomarla?

- a. Si
- b. No
- c. No sabe
- d. Se rehúsa a responder

27. Cuanta leche hervida toma por semana? (numero de vasos enteros)

- a. Número de vasos
- b. No sabe
- c. Se rehúsa a responder

Cuantos vasos por semana

28. Cuanta leche no hervida se toma por semana (numero de vasos enteros)?

- a. Número de vasos
- b. No sabe
- c. Se rehúsa a responder

Cuantos vasos por semana

29. Cuanta leche comprada en la tienda/supermercado toma por semana (numero de vasos enteros)?

- a. Número de vasos
- b. No sabe
- c. Se rehúsa a responder

Cuantos vasos por semana

#### IV. FACTORES RELACIONADOS A VIAJES

30. En los ultimos 14 dias, ha salido fuera de su municipio dentro del departamento Quetzaltenango?

- a. Si
- b. No

31. A que municipio?

- a. San Carlos Sija
- b. Cabricán
- c. Huitán
- d. Sibilía
- e. Cajolán
- f. Palestina de los Altos
- g. San Miguel Sigüilla
- h. San Juan Ostuncalco
- i. San mateo
- j. San Francisco La Unión
- k. La Esperanza
- l. Olinstepeque
- m. Salcájam
- n. Quetzaltenango
- o. Almolonga
- p. Cantel
- q. Zunil
- r. El Palmar
- s. Concepción Chiquirichapa
- t. San Martín Sacatepéquez
- u. Colomba
- v. Flores Costa Cuca
- w. Coatepeque

32. En este viaje, Cuanto tiempo estuvo fuera de su casa?

- a. Una semana o menos
- b. Más de una semana, pero menos de un mes
- c. Un mes o más

33. Con que frecuencia viaja a esa localidad?  
(Número de veces)

33.1. Con que frecuencia viaja a esa localidad?  
(Veces por)

- 
- Semana
  - Mes
  - Año

34. En los últimos 14 días Ha ido a algun departamento fuera de Quetzaltenango?

- a. Si
- b. No
- c. No sabe
- d. Se rehusa a responder

35. A que departamento?

- a. Alta Verapaz
- b. Baja Verapaz
- c. Chimaltenango
- d. Chiquimula
- e. El Petén
- f. El Progreso
- g. El Quiché
- h. Escuintla
- i. Guatemala
- j. Huehuetenango
- k. Izabal
- l. Jalapa
- m. Jutiapa
- n. Quetzaltenango
- o. Retalhuleu
- p. Sacatepéquez
- q. San Marcos
- r. Santa Rosa
- s. Sololá
- t. Suchitepéquez
- u. Totonicapán
- v. Zacapa



36. En su ultimo viaje al departamento X, cuanto tiempo estuvo fuera de su casa?

- a. Una semana o menos  
 b. MÃ¡s de una semana, pero menos de un mes  
 c. Un mes o mÃ¡s

37. Con que frecuencia viaja a ese departamento? (NÃºmero de veces)

\_\_\_\_\_

37.1 Con que frecuencia viaja a ese departamento? (Veces por)

- Semana  
 Mes  
 AÃ±o

38. En los ultimos 14 dias Ha ido a otro pais fuera de Guatemala?

- a. Si  
 b. No

39. A que pais?

- a. MÃ©xico  
 b. El Salvador  
 c. Honduras  
 d. Belice  
 e. Estados Unidos  
 f. Otro.

39.1 ÃCual otro paÃ­s?

\_\_\_\_\_

40. En el ultimo viaje a otro pais, cuanto tiempo estuvo fuera de su casa?

- a. Una semana o menos  
 b. MÃ¡s de una semana, pero menos de un mes  
 c. Un mes o mÃ¡s

41. Con que frecuencia viaja a ese paÃ­s? (NÃºmero de veces)

\_\_\_\_\_

41.1 Con que frecuencia viaja a ese pais? (Veces por)

- Semana  
 Mes  
 AÃ±o

---



---

#### IV. Enfermedades Previas-Diarrea y exposiciÃ³n a hospitales: Ahora quisiera preguntarle sobre eventos previos de enfermedad diarreica.

42. En los ultimos 14 dias, ha tenido diarrea?

- a. Si  
 b. No  
 c. No sabe  
 d. Se rehÃºsa a responder

43. Hace cuantos dias tuvo su ultimo episodio de diarrea/asientos?

\_\_\_\_\_

44. Durante el peor dÃ­a de diarrea/asientos: cuantas veces fue al baÃ±o?

\_\_\_\_\_

45. Durante este episodio de diarrea/asientos, tuvo sintomas de vomitos?

- a. Si  
 b. No  
 c. No sabe  
 d. Se rehÃºsa a responder

46. Busco algun tipo de atencion fuera de la casa para curar su diarrea?

- a. Si  
 b. No  
 c. No sabe  
 d. Se rehÃºsa a responder

47. Si busco algun tipo de atencion fuera de la casa, a donde acudio? (marque todos los que apliquen)

- a. Puesto de Salud
- b. Centro de Salud
- c. Hospital P blico
- d. Hospital Privado
- e. Cl nica Privada
- f. Centro de Convergencia
- g. Trabajador de Salud
- h. Feria M dica
- i. Farmacia
- j. Tienda
- k. Curandero
- l. Miembros de la Familia y/o amigos
- m. Otros

Otro \_\_\_\_\_

48. Tomo algun medicamento para tratar este episodio de diarrea/asientos?

- a. Si
- b. No
- c. No sabe
- d. Se rehusa a responder

49. Que medicamentos tomo?

- a. Medicamentos para el dolor
- b. Desparasitantes
- c. Remedios de hierbas
- d. Otros
- e. Ninguno

Nombre del medicamento \_\_\_\_\_

Remedios de hierbas: \_\_\_\_\_

50. Nos menciona usted estos antibioticos en las preguntas que le hicimos anteriormente?

- a. Si
- b. No
- c. No sabe
- d. Se reh sa a responder

51. Usted trabaja en el hospital?

- a. Si
- b. No

52. En los ultimos 3 meses, ha visitado el hospital por alguna razon?

- a. Si
- b. No
- c. No sabe
- d. Reh sa

53. Por que visito el hospital?

- a. Para hacer un tramite
- b. para visitar a un paciente internado/Acompa ar a un familiar
- c. Para un chequeo m dico rutinario
- d. Para recibir un tratamiento
- e. Porque estaba enfermo y me internaron
- f. Otro
- g. No sabe
- h. Se reh sa a responder

Otro \_\_\_\_\_

54. En los ultimos 3 meses, ha visitado el centro de salud por alguna razon?

- a. Si
- b. No
- c. No sabe
- d. Se reh sa a responder

55. Por que visito el centro de salud?

- a. Para hacer un tramite
- b. para visitar a un paciente internado/Acompañar a un familiar
- c. Para un chequeo médico rutinario
- d. para recibir un tratamiento
- e. porque estaba enferma y me internaron
- f. Otro, especificar
- g. No sabe
- h. Se rehúsa a responder

Otro

---

# Cuestionario NiÃ±o menor de 5 AÃ±os

**Preguntas de tamizaje - Gracias por su participaciÃ³n en el proyecto. Como le comentamos al principio, tambiÃ©n estamos interesados en la participaciÃ³n de un niÃ±o menor de 5 aÃ±os que viva en su hogar. Ahora le haremos unas preguntas sobre su niÃ±o. Estas preguntas son iguales a las que le hicimos a usted.**

1. Â¿El niÃ±o ha vivido en la casa durante por lo menos un aÃ±o (o desde su nacimiento)?
- a. SÃ-
- b. No
2. Â¿El niÃ±o vivirÃ¡ en la misma casa por lo menos un aÃ±o mÃ¡s?
- a. Si
- b. No
3. Â¿El niÃ±o estÃ¡ enfermo el dÃ­a de hoy con diarrea, fiebre aguda o una enfermedad respiratoria severa?
- a. SÃ-- Finalizado
- b. No
4. Â¿El niÃ±o estÃ¡ tomando algÃºn medicamento el dÃ­a de hoy?
- a. SÃ-
- b. No
5. Nos puede enseÃ±ar quÃ© medicamento estÃ¡ tomando?
- SÃ-, consultar el listado para ver si se trata de un antibiÃ³tico. Si estÃ¡ en la lista de antibiÃ³ticos no puede participar. Si no estÃ¡ en la lista, llamar a Puri y Brooke para aclarar si se trata de un antibiÃ³tico o no
- No, no lo puede mostrar
- 5.1 Nos puede decir cual medicamento esta tomando?
- a. SÃ-
- b. No, no lo puede decir. Finalizado.
- " El encuestador debe verificar si se trata de un antibiÃ³tico o no. Puede ayudarse con el Ã¡lbum de medicamentos o, en el caso de dificultad, llamando a Brooke o a Puri"
6. Â¿Es un antibiÃ³tico lo que estÃ¡ tomando el niÃ±o en el dÃ­a de hoy?
- a. SÃ-, Finalizado
- b. No - proceder al consentimiento informado
- ELEGIBLE O NO
7. Â¿El encargado del niÃ±o dio su consentimiento informado para que el niÃ±o participe?
- a. SÃ-
- b. No- Finalizado

## INFORMACIÃ“N DEMOGRÃ“FICA del niÃ±o participante

1. Codigo/identificacion (xxx-xx) \_\_\_\_\_
- Latitud \_\_\_\_\_
- Longitud \_\_\_\_\_
2. Localidad
- Coatepeque
- San Juan Ostuncalco
- a. Coatepeque (listado definido de opciones)
- a. El Jardin
- b. La Union

b. San Juan Ostuncalco (listado definido de opciones)

1. Casco Urbano  
 2. Monrovia

3. Sexo

- a. Masculino  
 b. Femenino

4. ¿Cuántos años tiene el niño? (anotar # años completos)

\_\_\_\_\_

## I. Factores en el Medio Ambiente: Fuentes de Agua, construcción de casa, manejo de basura

5. La última vez el niño defecó, ¿cómo desecharon las heces?

- a. El niño uso el inodoro/letrina  
 b. Se pusieron adentro del inodoro o letrina  
 c. Se pusieron adentro/enjuagaron en el desagüe o zanja (o lo lavaron en la pila)  
 d. Se tiraron a la basura  
 e. Se enterraron  
 f. Se dejaron en el patio al aire libre  
 g. Se dejaron afuera del lote al aire libre  
 h. Otro  
 i. No sabe  
 j. Se rehúsa a responder

Otro

\_\_\_\_\_

6. ¿Usa el niño el agua del río en su casa?

- a. Si  
 b. No  
 c. No sabe  
 d. Se rehúsa a responder

7. ¿Para qué se usa el niño el agua del río en su casa?

- a. Para jugar adentro del río  
 b. Para jugar con el agua afuera del río  
 c. Para ayudar a cocinar  
 d. Cuando ayuda en lavar platos  
 e. Cuando ayuda a lavar ropa  
 f. Bañarse  
 g. Para ayudar a regar jardines  
 h. No sabe  
 i. Se rehúsa a responder

## II. Prácticas en la Vivienda: Lavado de manos

**ENCUESTADOR LEA: Ahora me gustaría preguntarle sobre higiene en los hábitos del hogar. Estas preguntas tienen que ver principalmente con el lavado de manos del niño en su hogar.**

8. ¿Se ha lavado las manos el niño con agua por cualquier razón el día de hoy? (MARQUE UNO)

- a. Si  
 b. No  
 c. No sabe  
 d. Se rehúsa a responder

9. ¿De qué fuente salió el agua con que se lavó las manos?

- a. Con agua del chorro  
 b. Con agua de un bote (agua estancada)  
 c. Otra fuente de agua  
 d. No sabe  
 e. Se rehúsa a responder

9. 1 Otra fuente de agua

\_\_\_\_\_

10. Uso jabon?

- a. SÃ-  
 b. No  
 c. No sabe  
 d. Se rehÃsa a responder

---

### III. PrÃcticas de la vivienda incluyendo posesiÃn de animales, mÃtodos de cocciÃn y dieta

11. Â¿El niÃo come carne?

- a. Si  
 b. No  
 c. No sabe  
 d. Se rehÃsa a responder

12. Â¿QuÃ© tipo de carne? (puede responder a varios)

- a. Pollo  
 b. Carne de cerdo  
 c. Carne de res  
 d. Pescado  
 e. Conejo  
 f. Chompipe  
 g. Pato  
 h. Otro, indique  
 i. No sabe  
 j. Se rehÃsa a responder

12.1 QuÃ© otro tipo de carne?

\_\_\_\_\_

13. indique la procedencia de cada tipo de carne que el niÃo come

- a. Criado en la casa  
 b. Comprado en el mercado  
 c. Comprado en el supermercado  
 d. Comprado en la despensa  
 e. Comprado en la tienda  
 f. Otro, especificar  
 g. No sabe  
 h. Se rehÃsa a responder

13.1 Otro

\_\_\_\_\_

14. Â¿El niÃo toma leche?

- a. Si  
 b. No  
 c. No sabe  
 d. Se rehÃsa a responder

15. Â¿QuÃ© tipo de leche toma?

- a. Leche Materna  
 b. Leche de vaca (en fresco)  
 c. Leche en polvo  
 d. Leche en caja  
 e. Leche de cabra (en fresco)  
 f. Leche en bolsa  
 g. Otro

Otro

\_\_\_\_\_

16. Â¿Trata (o prepara) de alguna forma la leche de vaca o cabra (en fresco) antes de tomarla?

- a. Si  
 b. No  
 c. No sabe  
 d. Se rehÃsa a responder

17. Â¿Hierve la leche antes de tomarla?

- a. Si  
 b. No  
 c. No sabe  
 d. Se rehÃsa a responder

18. ¿Cuánta leche hervida toma por semana?  
(número de vasos/pachas enteros)

- a. Número de vasos/pachas  
 b. No sabe  
 c. Se rehúsa a responder

Cuantos vasos/pachas por semana

---

19. ¿Cuánta leche no hervida se toma por semana?  
(número de vasos/pachas enteros)?

- a. Número de vasos/pachas  
 b. Nada  
 c. No sabe  
 d. Se rehúsa a responder

Cuantos vasos/pachas por semana

---

20. ¿Cuánta leche comprada en la tienda/supermercado toma por semana (número de vasos/pachas enteros)?

- a. Número de vasos/pachas  
 b. No sabe  
 c. Se rehúsa a responder

Cuantos vasos/pachas por semana

---

21. ¿Usted guarda la leche que toma su niño?

- a. Si  
 b. No

22. ¿En dónde se guarda la leche?

- a. En frío  
 b. No en frío  
 c. No sabe  
 d. Se rehúsa a responder

23. ¿En qué tipo de recipiente guarda la leche?

- a. En su recipiente original desechable (comprado en la tienda/supermercado) (ir a P27)  
 b. Plástico (ir a P24)  
 c. Metal (ir a P24)  
 d. Vidrio (ir a P24)  
 e. Bolsa (ir a P24)  
 f. No sabe (ir a P27)  
 g. Se rehúsa a responder (ir a P27)

24. ¿Es un recipiente dedicado únicamente para la leche?

- a. Si  
 b. No  
 c. No sabe  
 d. Se rehúsa a responder

25. ¿Lava el recipiente antes de agregarle leche?

- a. Si  
 b. No  
 c. No sabe  
 d. Se rehúsa a responder

26. ¿Cómo lava el recipiente? (marque los que aplican)

- a. Con agua y jabón  
 b. Únicamente con desinfectante (ej: cloro)  
 c. Con agua, jabón y desinfectante  
 d. Hervir el recipiente  
 e. No sabe  
 f. Se rehúsa a responder

#### IV. FACTORES RELACIONADOS A VIAJES

27. En los últimos 14 días, ¿el niño ha salido fuera de su municipio dentro del departamento de Quetzaltenango?

- a. Si  
 b. No

28. A que municipio?

- a. San Carlos Sija
- b. Cabricán
- c. Huitán
- d. Sibilá
- e. Cajolán
- f. Palestina de los Altos
- g. San Miguel Sigüilla
- h. San Juan Ostuncalco
- i. San mateo
- j. San Francisco La Unión
- k. La Esperanza
- l. Olinstepeque
- m. Salcájn
- n. Quetzaltenango
- o. Almolonga
- p. Cantel
- q. Zunil
- r. El Palmar
- s. Concepción Chiquirichapa
- t. San Martín Sacatepéquez
- u. Colomba
- v. Flores Costa Cuca
- w. Coatepeque

29. En este viaje, ¿Cuánto tiempo estuvo fuera de la casa el niño?

- a. Una semana o menos
- b. Más de una semana, pero menos de un mes
- c. Un mes o más

30. Con que frecuencia viaja a esa localidad?  
(Número de veces)

30.1. Con que frecuencia viaja a esa localidad?  
(Veces por)

- 
- Semana
  - Mes
  - Año

31. En los últimos 14 días ¿el niño ha ido a un departamento fuera de Quetzaltenango?

- a. Si
- b. No
- c. No sabe
- d. Se rehúsa a responder

32. A que departamento?

- a. Alta Verapaz
- b. Baja Verapaz
- c. Chimaltenango
- d. Chiquimula
- e. El Petén
- f. El Progreso
- g. El Quiché
- h. Escuintla
- i. Guatemala
- j. Huehuetenango
- k. Izabal
- l. Jalapa
- m. Jutiapa
- n. Quetzaltenango
- o. Retalhuleu
- p. Sacatepéquez
- q. San Marcos
- r. Santa Rosa
- s. Sololá
- t. Suchitepéquez
- u. Totonicapán
- v. Zacapa



33. En su ultimo viaje al departamento X, cuanto tiempo estuvo fuera de su casa?

- a. Una semana o menos  
 b. MÃas de una semana, pero menos de un mes  
 c. Un mes o mÃas

34. Con que frecuencia viaja a ese departamento? (NÃmero de veces)

\_\_\_\_\_

34.1 Con que frecuencia viaja a ese departamento? (Veces por)

- Semana  
 Mes  
 AÃ±o

35. En estos 14 dÃas Â¿el niÃ±o ha ido a otro paÃs fuera de Guatemala?

- a. Si  
 b. No

36. A que pais?

- a. MÃxico  
 b. El Salvador  
 c. Honduras  
 d. Belice  
 e. Estados Unidos  
 f. Otro.

36.1 Â¿CuÃil otro paÃs?

\_\_\_\_\_

37. En el Ãltimo viaje del niÃ±o a otro paÃs, Â¿cuÃnto tiempo estuvo fuera de su casa

- a. Una semana o menos  
 b. MÃas de una semana, pero menos de un mes  
 c. Un mes o mÃas

38. Â¿Con quÃ© frecuencia viaja el niÃ±o a esa paÃs?

\_\_\_\_\_

38.1 Con que frecuencia viaja el niÃ±o a ese paÃs? (Veces por)

- Semana  
 Mes  
 AÃ±o

#### IV. Historia de uso antibiÃ³tico

**En la siguiente secciÃ³n de la encuesta le preguntaremos sobre el uso de medicamentos, especialmente, el uso de antibiÃ³ticos por el niÃ±o. Los antibiÃ³ticos se definen como medicamentos usados para matar las bacterias.**

39. Â¿El niÃ±o ha tomado antibiÃ³ticos alguna vez?

- a. Si  
 b. No  
 c. No sabe  
 d. Se rehÃ³sa a responder

40. Â¿El niÃ±o ha tomado antibiÃ³ticos en los Ãºltimos 14 dÃas?

- a. Si  
 b. No  
 c. No sabe  
 d. Se rehÃ³sa a responder

41. La última vez que el niño tomó un antibiótico, ¿para qué enfermedad lo tomó? (puede seleccionar más de una)

- a. Nariz congestionada
- b. Tos
- c. Dolor de cabeza
- d. Fiebre
- e. Vómitos
- f. Diarrea
- g. Heridas de la piel
- h. Malaria
- i. VIH
- j. Zika
- k. Dengue
- l. Chikungunya
- m. Tuberculosis
- n. Otro. Especificar.
- o. No Sabe
- p. Se rehúsa a responder

Otro

42. Hablando de la enfermedad que le dio en la P41, ¿buscó algún tipo de ayuda médica para tratar la enfermedad del niño?

- a. Sí
- b. No
- c. No sabe
- d. Se rehúsa a responder

43. ¿Dónde buscó ayuda médica para el niño?

- a. Puesto de Salud
- b. Centro de Salud
- c. Hospital Público
- d. Hospital Privado
- e. Clínica Privada
- f. Centro de Convergencia
- g. Trabajador de Salud
- h. Feria Médica
- i. Farmacia
- j. Tienda
- k. Curandero
- l. Miembros de la Familia y/o amigos
- m. Otros, especificar
- n. No sabe
- o. Se rehúsa a responder

Otro

44. ¿Qué medicamentos usó para tratar al niño en esta enfermedad en particular (pregunte para cada enfermedad mencionada en P42). Pida ver los medicamentos si están disponibles, y pregunte "¿qué otro medicamento le dio al niño?" hasta que ya no mencionen otros medicamentos.

- a. Antibióticos
- b. Desparasitantes
- c. Medicamentos para el dolor
- d. Medicamentos naturales
- e. Otros,
- f. No sabe
- g. Se rehúsa a responder

Otro

Cuántos antibióticos ha tomado?

---



---

**20. Para cada antibi3tico complete la siguiente tabla:**

DATOS MEDICINA No 1

Nombre de la medicina (1) \_\_\_\_\_

â€¢ Se examino paquete o botella (si/no)

- Si  
 No

â€¢ El nombre del medicamento se puede leer

- Si  
 No

Le recetaron este medicamento en un puesto/centro/clinica privada de salud?

- Si  
 No  
 No se  
 No Responde

â€¢ Si, indique en que lugar se le receto/recomendo.

- Centro de salud MSPAS  
 Puesto de salud/CIÃ-nica privada

Si no, como sabia que medicamento comprar?

- Amigo o familiar  
 Experiencia previa  
 Persona en la farmacia/mÃ-Ã½dico/otro

En donde consiguio el medicamento?

- Farmacia  
 Tienda  
 Super  
 MSPAS  
 Amigo o familiar  
 Comadronas  
 Curanderos  
 Otros

Cuantos dias tomo el medicamento? \_\_\_\_\_

Con que frecuencia toma antibioticos?

- Cada mes  
 Cada tres meses  
 Cada 6 meses  
 Cada aÃ±o  
 Cada vez que es necesario  
 No sabe  
 No responde

Ademas de usted, uso otra persona o animal este medicamento?

- SI  
 No

â€¢ Si si, que otra persona o animal uso este medicamento?

- a. PapÃi o MamÃi  
 b. Pareja  
 c. Hermanos(as)  
 d. Hijos  
 e. Abuelos  
 f. Otro parientes  
 g. Animal

---

---

**Medicina 2**

Nombre de la medicina \_\_\_\_\_

¿ Se examinó paquete o botella (si/no)

- Si  
 No

¿ El nombre del medicamento se puede leer

- Si  
 No

Le recetaron este medicamento en un puesto/centro/clinica privada de salud?

- Si  
 No  
 No se  
 No Responde

¿ Si, indique en que lugar se le receto/recomendo.

- Centro de salud MSPAS  
 Puesto de salud/Clínica privada

Si no, como sabia que medicamento comprar?

- Amigo o familiar  
 Experiencia previa  
 Persona en la farmacia/médico/otro

En donde consiguio el medicamento?

- Farmacia  
 Tienda  
 Super  
 MSPAS  
 Amigo o familiar  
 Comadronas  
 Curanderos  
 Otros

Cuantos dias tomo el medicamento? \_\_\_\_\_

Con que frecuencia toma antibioticos?

- Cada mes  
 Cada tres meses  
 Cada 6 meses  
 Cada año  
 Cada vez que es necesario  
 No sabe  
 No responde

Ademas de usted, uso otra persona o animal este medicamento?

- SI  
 No

¿ Si si, que otra persona o animal uso este medicamento?

- a. Papá o Mamá  
 b. Pareja  
 c. Hermanos(as)  
 d. Hijos  
 e. Abuelos  
 f. Otro parientes  
 g. Animal

---

---

**Medicina 3**

Nombre de la medicina \_\_\_\_\_

¿ Se examino paquete o botella (si/no)

- Si  
 No

¿ El nombre del medicamento se puede leer

- Si  
 No

Le recetaron este medicamento en un puesto/centro/clinica privada de salud?

- Si  
 No  
 No se  
 No Responde

Indique en que lugar se le receto/recomendo.

- Centro de salud MSPAS  
 Puesto de salud/Clínica privada

Si no, como sabia que medicamento comprar?

- Amigo o familiar  
 Experiencia previa  
 Persona en la farmacia/médico/otro

En donde consiguio el medicamento?

- Farmacia  
 Tienda  
 Super  
 MSPAS  
 Amigo o familiar  
 Comadronas  
 Curanderos  
 Otros

Cuantos dias tomo el medicamento? \_\_\_\_\_

Con que frecuencia toma antibioticos?

- Cada mes  
 Cada tres meses  
 Cada 6 meses  
 Cada año  
 Cada vez que es necesario  
 No sabe  
 No responde

Ademas de usted, uso otra persona o animal este medicamento?

- SI  
 No

¿ Si si, que otra persona o animal uso este medicamento?

- a. Papá o Mamá  
 b. Pareja  
 c. Hermanos(as)  
 d. Hijos  
 e. Abuelos  
 f. Otro parientes  
 g. Animal

---



---

**V. Enfermedades Previas-Diarrea y exposici3n a hospitales: Ahora quisiera preguntarle sobre eventos previos de enfermedad diarreica del ni3o.**

46. En los 3ltimos 14 d3-as, 3ha tenido diarrea el ni3o?

- a. Si  
 b. No  
 c. No sabe  
 d. Se reh3sa a responder

47. 3Hace cu3ntos d3-as tuvo el ni3o el 3ltimo episodio de diarrea/asientos?  
 N3meros enteros

---

48. Durante el peor d3-a de diarrea/asientos: (EN UN PER3ODO DE 24 HORAS) 3cu3ntas veces fue al ba3o?

---

49. Durante este episodio de diarrea/asientos, 3tuvo el ni3o v3mitos?

- a. Si  
 b. No  
 c. No sabe  
 d. Se reh3sa a responder

50. 3Busc3 alg3n tipo de atenci3n m3dica fuera de la casa para curar la diarrea del ni3o?

- a. Si  
 b. No  
 c. No sabe  
 d. Se reh3sa a responder

51. Si busc3 alg3n tipo de atenci3n fuera de la casa, 3a d3nde acudi3? (marque todos los que apliquen)

- a. Puesto de Salud  
 b. Centro de Salud  
 c. Hospital P3blico  
 d. Hospital Privado  
 e. Cl3nica Privada  
 f. Centro de Convergencia  
 g. Trabajador de Salud  
 h. Feria M3dica  
 i. Farmacia  
 j. Tienda  
 k. Curandero  
 l. Miembros de la Familia y/o amigos  
 m. Otros

Otro

---

52. 3El ni3o tom3 alg3n medicamento para tratar este episodio de diarrea/asientos?

- a. Si  
 b. No  
 c. No sabe  
 d. Se reh3sa a responder

53. 3Qu3 medicamentos tom3 el ni3o?

- a. Medicamentos para el dolor  
 b. Desparasitantes  
 c. Remedios de hierbas  
 d. Otros  
 e. Ninguno

Otro

---

Remedios de hierbas:

---

54. 3Nos mencion3 usted estos antibi3ticos en las preguntas que le hicimos anteriormente (P45)?

- a. Si  
 b. No  
 c. No sabe  
 d. Se reh3sa a responder

55. En los últimos 3 meses, ¿el niño ha visitado el hospital por alguna razón?

- a. Si
- b. No
- c. No sabe
- d. Resuena

56. ¿Por qué visitó el niño el hospital?

- a. Para hacer un trámite
- b. para visitar a un paciente internado/Acompañar a un familiar
- c. Para un chequeo médico rutinario
- d. Para recibir un tratamiento
- e. Porque estaba enfermo y lo internaron
- f. Otro
- g. No sabe
- h. Se resuena a responder

Otro

57. En los últimos 3 meses, ¿el niño ha visitado el centro de salud por alguna razón?

- a. Si
- b. No
- c. No sabe
- d. Se resuena a responder

58. ¿Por qué visitó el niño el centro de salud?

- a. Para hacer un trámite
- b. para visitar a un paciente internado/Acompañar a un familiar
- c. Para un chequeo médico rutinario
- d. para recibir un tratamiento
- e. porque estaba enferma y me internaron
- f. Otro, especificar
- g. No sabe
- h. Se resuena a responder

Otro

# Muestras de laboratorio Adultos

Código \_\_\_\_\_

Lugar de origen

- La Union  
 El jardin  
 San Juan Ostuncalco  
 Monrovia

Muestra de Heces

- Si  
 No

Fecha y hora de recolección (Trabajador de Campo)

\_\_\_\_\_

Fecha y hora de recepción en sitio de Hospital

\_\_\_\_\_

---

---

## Procesamiento en laboratorio

Heces entera

- Si  
 No

Fecha de elaboración

\_\_\_\_\_

Recepción Laboratorio UVG

\_\_\_\_\_

Heces líquida almacenada en crio tubo

- Si  
 No

Fecha de elaboración

\_\_\_\_\_

Recepción Laboratorio UVG

\_\_\_\_\_

Placa MacConkey para aislamiento de E. coli

- Si  
 No

Fecha de elaboración

\_\_\_\_\_

Recepción Laboratorio UVG

\_\_\_\_\_

Placa de 96 pocillos con caldo LB

- Si  
 No

Fecha de elaboración

\_\_\_\_\_

Recepción Laboratorio UVG

\_\_\_\_\_

Placas MacConkey con antibióticos

- Si  
 No

Fecha de elaboración

\_\_\_\_\_

Fecha de elaboración

\_\_\_\_\_



---

---

### Pruebas de parásitos

¿Se realizó la prueba de parásitos?

- Si
- No

Fecha en que se realizó la prueba de parásitos

\_\_\_\_\_

¿Resultado de prueba de parásitos?

- Helmintos
- Protozoos
- Ambos
- Negativo

Observaciones

\_\_\_\_\_

# Muestras de laboratorio Menores de 5 AÑ±os

CÃ³digo \_\_\_\_\_

Lugar de origen

- La Union  
 El jardin  
 San Juan Ostuncalco  
 Monrovia

Muestra de Heces

- Si  
 No

Fecha y hora de recolecciÃ³n (Trabajador de Campo)

\_\_\_\_\_

Fecha y hora de recepciÃ³n en sitio de Hospital

\_\_\_\_\_

---

---

## Procesamiento en laboratorio

Heces entera

- Si  
 No

Fecha de elaboraciÃ³n

\_\_\_\_\_

RecepciÃ³n Laboratorio UVG

\_\_\_\_\_

Heces liquida almacenada en crio tubo

- Si  
 No

Fecha de elaboraciÃ³n

\_\_\_\_\_

RecepciÃ³n Laboratorio UVG

\_\_\_\_\_

Placa MacConkey para aislamiento de E. coli

- Si  
 No

Fecha de elaboraciÃ³n

\_\_\_\_\_

RecepciÃ³n Laboratorio UVG

\_\_\_\_\_

Placa de 96 pocillos con caldo LB

- Si  
 No

Fecha de elaboraciÃ³n

\_\_\_\_\_

RecepciÃ³n Laboratorio UVG

\_\_\_\_\_

Placas MacConkey con antibiÃ³ticos

- Si  
 No

Fecha de elaboraciÃ³n

\_\_\_\_\_

Fecha de elaboraciÃ³n

\_\_\_\_\_

---

---

### Pruebas de parásitos

¿Se realizó la prueba de parásitos?

- Si
- No

Fecha en que se realizó la prueba de parásitos

\_\_\_\_\_

¿Resultado de prueba de parásitos?

- Helmintos
- Protozoos
- Ambos
- Negativo

Observaciones

\_\_\_\_\_

# Cuestionario De Hogar

Record ID

---

Fecha en que se realiza la encuesta

---

I. Buenos días/tardes, mi nombre es (NOMBRE PERSONA HABLANDO) y vengo hoy con mi compañero de trabajo (NOMBRE COMPAÑERO DEL TRABAJO). Estamos visitando su casa el día de hoy porque estamos realizando la segunda fase del estudio sobre la resistencia a los antibióticos. ¿Sería posible hablar con \_\_\_\_\_ (nombrar al representante del hogar que entrevistamos anteriormente)?

- a. Si- continuar  
 b. No, no está el representante del hogar. Preguntar a qué hora pueden regresar para hablar con la persona que participó anteriormente.  
 c. Persona se niega a participar en la segunda fase- terminar.

1. ¿Cuántas personas en total viven en esta vivienda (incluidos niños, ancianos, personas discapacitadas, etc.)?

---

Genero(1):

1. Masculino  
 2. Femenino

Edad(1):

---

Genero(2):

1. Masculino  
 2. Femenino

Edad(2):

---

Genero(3):

1. Masculino  
 2. Femenino

Edad(3):

---

Genero(4):

1. Masculino  
 2. Femenino

Edad(4):

---

Genero(5):

1. Masculino  
 2. Femenino

Edad(5):

---

Genero(6):

1. Masculino  
 2. Femenino

Edad(6):

---

Genero(7):

1. Masculino  
 2. Femenino

Edad(7):

---

Genero(8):

1. Masculino  
 2. Femenino

Edad(8):

---

Genero(9):

1. Masculino  
 2. Femenino

Edad(9): \_\_\_\_\_

Genero(10):  1. Masculino  
 2. Femenino

Edad(10): \_\_\_\_\_

Genero(11):  1. Masculino  
 2. Femenino

Edad(11): \_\_\_\_\_

Genero(12):  1. Masculino  
 2. Femenino

Edad(12): \_\_\_\_\_

Genero(13):  1. Masculino  
 2. Femenino

Edad(13): \_\_\_\_\_

Genero(14):  1. Masculino  
 2. Femenino

Edad(14): \_\_\_\_\_

Genero(15):  1. Masculino  
 2. Femenino

Edad(15): \_\_\_\_\_

Genero(16):  1. Masculino  
 2. Femenino

Edad(16): \_\_\_\_\_

Genero(17):  1. Masculino  
 2. Femenino

Edad(17): \_\_\_\_\_

Genero(18):  1. Masculino  
 2. Femenino

Edad(18): \_\_\_\_\_

Genero(19):  1. Masculino  
 2. Femenino

Edad(19): \_\_\_\_\_

Genero(20):  1. Masculino  
 2. Femenino

Edad(20): \_\_\_\_\_

INFORMACIoN DEMOGR&Aacute;FICA del representante del hogar

1. C&oacute;digoo / identificaci&oacute;ten \_\_\_\_\_

2. Localidad  Coatepeque  
 San Juan Ostuncalco

3. Coatepeque  1.El Jardin  
 2.La Union
3. San Juan Ostuncalco  1.Casco Urbano  
 2.Monrovia
4. ¿Tiene usted en su vivienda Electricidad?  Si  
 No  
 No sabe  
 Se rehúsa a responder
5. ¿Tiene usted en su vivienda Computadora?  Si  
 No  
 No sabe  
 Se rehúsa a responder

---

**Sección 2 ENCUESTADOR LEA: Muchas gracias por su tiempo. Ahora quiero hacerle unas preguntas sobre varias condiciones en su hogar. Estas preguntas las hacemos en cada casa que visitamos.**

6. Los miembros de su familia tienen animales que viven libremente afuera de la casa? (MARQUE UNO)  Si  
 No  
 No sabe  
 Se rehúsa a responder
7. Que animales tienen? (MARQUE TODAS LAS QUE APLIQUEN, INDICAR CUANTOS ANIMALES DE CADA TIPO)  a. Perros  
 b. Gatos  
 c. Pollos  
 d. Pavos  
 e. Patos  
 f. Gansos  
 g. Otros pajaros  
 h. Cerdos  
 i. Vacas  
 j. Ovejas  
 k. Cabras  
 l. Otros animales  
 m. No sabe  
 n. Se rehúsa a responder

Cual otro animal? \_\_\_\_\_

Quí otro pajaros? \_\_\_\_\_

En la siguiente secciín de la encuesta le preguntaremos sobre el uso de medicamentos, especialmente, el uso de antibiíticos con sus animales. Los antibiíticos se definen como medicamentos usados para matar las bacterias. Las bacterias son microorganismos que causan infecciones. Los antibiíticos se venden en las farmacias y agropecuarias de Guatemala y algunas veces en tiendas y supermercados. El Ministerio de Salud Pública tambiín proporciona antibiíticos a los que tienen una receta de un mídico del MSPAS. Los antibiíticos mís comunes son amoxicilina y tetraciclina (mostrar ejemplos adquiridos del ministerio de salud y tiendas cercanas) y frecuentemente se recomiendan despuís de visitar al doctor. Algunas veces, las personas deciden tomar antibiíticos sin tener la recomendaciín del doctor o veterinario.

PERROS

Cuantos Perros? \_\_\_\_\_

Desde la &uacute;ltima visita, &iquestles ha dado antibi&ocuteticos a su/sus perro/perros?

- a. Si  
 b. No  
 c. No sabe  
 d. Se reh&uacutesa a responder

---

#### DATOS MEDICINA PERROS

Nombre de la Medicina/Antibiotico

Caja de la medicina o botella vista (si/no)

- Si  
 No

Se puede leer el nombre?

- Si  
 No

&iquestCon qu&eacute; frecuencia les da esta medicina a sus animales?

- Cada mes  
 Cada tres meses  
 Cada 6 meses  
 Cada a&ntilde;o  
 Cada vez que es necesario  
 No sabe  
 No responde

#### GATOS

Cuantos Gatos?

---

Desde la &uacute;ltima visita, &iquestles ha dado antibi&ocuteticos a su/sus gato/gatos?

- a. Si  
 b. No  
 c. No sabe  
 d. Se reh&uacutesa a responder

---

#### DATOS MEDICINA GATOS

Nombre de la Medicina/Antibiotico

Caja de la medicina o botella vista (si/no)

- Si  
 No

Se puede leer el nombre?

- Si  
 No

&iquestCon qu&eacute; frecuencia les da esta medicina a sus animales?

- Cada mes  
 Cada tres meses  
 Cada 6 meses  
 Cada a&ntilde;o  
 Cada vez que es necesario  
 No sabe  
 No responde

#### PAVOS

Cuantos Pavos?

---

Desde la &uacute;ltima visita, &iquestles ha dado antibi&ocuteticos a su/sus pavo/pavos?

- a. Si  
 b. No  
 c. No sabe  
 d. Se reh&uacutesa a responder

---

#### DATOS MEDICINA PAVOS

Nombre de la Medicina/Antibiotico

Caja de la medicina o botella vista (si/no)

- Si  
 No

Se puede leer el nombre?

- Si  
 No

¿Con qué frecuencia les da esta medicina a sus animales?

- Cada mes  
 Cada tres meses  
 Cada 6 meses  
 Cada año  
 Cada vez que es necesario  
 No sabe  
 No responde

Después de darle antibióticos, ¿ha dejado de tomar la leche, comer los huevos o comer la carne del animal indicado, después de darle antibióticos?

- Sí  
 No

¿Durante cuánto tiempo ha dejado de tomarla? (Número de días)

---

**POLLOS**  
Cuántos Pollos?

---

Desde la última visita, ¿les ha dado antibióticos a su/sus pollo/pollos?

- a. Sí  
 b. No  
 c. No sabe  
 d. Se rehúsa a responder

**DATOS MEDICINA POLLOS**  
Nombre de la Medicina/Antibiótico

---

Caja de la medicina o botella vista (sí/no)

- Sí  
 No

Se puede leer el nombre?

- Sí  
 No

¿Con qué frecuencia les da esta medicina a sus animales?

- Cada mes  
 Cada tres meses  
 Cada 6 meses  
 Cada año  
 Cada vez que es necesario  
 No sabe  
 No responde

Después de darle antibióticos, ¿ha dejado de tomar la leche, comer los huevos o comer la carne del animal indicado, después de darle antibióticos?

- Sí  
 No

¿Durante cuánto tiempo ha dejado de tomarla? (Número de días)

---

**PATOS**  
Cuántos Patos?

---

Desde la última visita, ¿les ha dado antibióticos a su/sus patos/patos?

- a. Sí  
 b. No  
 c. No sabe  
 d. Se rehúsa a responder



## DATOS MEDICINA PATOS

Nombre de la Medicina/Antibiotico

---

Caja de la medicina o botella vista (si/no)

- Si  
 No

Se puede leer el nombre?

- Si  
 No

¿Con qué frecuencia les da esta medicina a sus animales?

- Cada mes  
 Cada tres meses  
 Cada 6 meses  
 Cada año  
 Cada vez que es necesario  
 No sabe  
 No responde

Después de darle antibióticos, ¿ha dejado de tomar la leche, comer los huevos o comer la carne del animal indicado, después de darle antibióticos?

- SI  
 No

¿Durante cuánto tiempo ha dejado de tomarla? (Número de días)

---

## GANSO

Cuantos Ganso?

---

Desde la última visita, ¿les ha dado antibióticos a su/sus ganso/gansos?

- a. Si  
 b. No  
 c. No sabe  
 d. Se rehúsa a responder

## DATOS MEDICINA GANSOS

Nombre de la Medicina/Antibiotico

---

Caja de la medicina o botella vista (si/no)

- Si  
 No

Se puede leer el nombre?

- Si  
 No

¿Con qué frecuencia les da esta medicina a sus animales?

- Cada mes  
 Cada tres meses  
 Cada 6 meses  
 Cada año  
 Cada vez que es necesario  
 No sabe  
 No responde

Después de darle antibióticos, ¿ha dejado de tomar la leche, comer los huevos o comer la carne del animal indicado, después de darle antibióticos?

- SI  
 No

¿Durante cuánto tiempo ha dejado de tomarla? (Número de días)

---

## PAJAROS

Cuantos Pajaros? \_\_\_\_\_

Desde la &amp;uacute;ltima visita, &amp;iquestles ha dado antibi&amp;ocuteticos a su/sus pajaro/pajaros?

- a. Si  
 b. No  
 c. No sabe  
 d. Se reh&uacutesa a responder

## DATOS MEDICINA PAJAROS

Nombre de la Medicina/Antibiotico \_\_\_\_\_

Caja de la medicina o botella vista (si/no)

- Si  
 No

Se puede leer el nombre?

- Si  
 No

&amp;iquestCon qu&amp;eacute; frecuencia les da esta medicina a sus animales?

- Cada mes  
 Cada tres meses  
 Cada 6 meses  
 Cada a&ntilde;o  
 Cada vez que es necesario  
 No sabe  
 No responde

Despu&amp;eacute;s de darle antibi&amp;ocuteticos, &amp;iquestha dejado de tomar la leche, comer los huevos o comer la carne del animal indicado, despu&amp;eacute;s de darle antibi&amp;ocuteticos?

- SI  
 No

&amp;iquestDurante cuanto tiempo ha dejado de tomarla? (Numero de d&amp;iacute;as)

\_\_\_\_\_

## CERDOS

Cuantos Cerdos? \_\_\_\_\_

Desde la &amp;uacute;ltima visita, &amp;iquestles ha dado antibi&amp;ocuteticos a su/sus cerdo/cerdos?

- a. Si  
 b. No  
 c. No sabe  
 d. Se reh&uacutesa a responder

## DATOS MEDICINA CERDOS

Nombre de la Medicina/Antibiotico \_\_\_\_\_

Caja de la medicina o botella vista (si/no)

- Si  
 No

Se puede leer el nombre?

- Si  
 No

&amp;iquestCon qu&amp;eacute; frecuencia les da esta medicina a sus animales?

- Cada mes  
 Cada tres meses  
 Cada 6 meses  
 Cada a&ntilde;o  
 Cada vez que es necesario  
 No sabe  
 No responde

Despu&eacute;s de darle antibi&ocuteticos, &iquestha dejado de comer la carne del animal indicado, despu&eacute;s de darle antibi&ocuteticos?

- SI  
 No

&iquestDurante cuanto tiempo ha dejado de tomarla?  
(Numero de d&iacute;as)

---

VACAS  
Cuantos Vacas?

---

Desde la &uacuteltima visita, &iquestles ha dado antibi&ocuteticos a su/sus vaca/vacas?

- a. Si  
 b. No  
 c. No sabe  
 d. Se reh&uacutesa a responder

DATOS MEDICINA VACAS  
Nombre de la Medicina/Antibiotico

---

Caja de la medicina o botella vista (si/no)

- Si  
 No

Se puede leer el nombre?

- Si  
 No

&iquestCon qu&eacute; frecuencia les da esta medicina a sus animales?

- Cada mes  
 Cada tres meses  
 Cada 6 meses  
 Cada a&ntilde;o  
 Cada vez que es necesario  
 No sabe  
 No responde

Despu&eacute;s de darle antibi&ocuteticos, &iquestha dejado de tomar la leche, comer la carne del animal indicado, despu&eacute;s de darle antibi&ocuteticos?

- SI  
 No

&iquestDurante cuanto tiempo ha dejado de tomarla?  
(Numero de d&iacute;as)

---

OVEJAS  
Cuantos Ovejas?

---

Desde la &uacuteltima visita, &iquestles ha dado antibi&ocuteticos a su/sus oveja/ovejas?

- a. Si  
 b. No  
 c. No sabe  
 d. Se reh&uacutesa a responder

DATOS MEDICINA OVEJAS  
Nombre de la Medicina/Antibiotico

---

Caja de la medicina o botella vista (si/no)

- Si  
 No

Se puede leer el nombre?

- Si  
 No

¿Con qué frecuencia les da esta medicina a sus animales?

- Cada mes  
 Cada tres meses  
 Cada 6 meses  
 Cada año  
 Cada vez que es necesario  
 No sabe  
 No responde

Después de darle antibióticos, ¿ha dejado de tomar la leche o comer la carne del animal indicado, después de darle antibióticos?

- SI  
 No

¿Durante cuánto tiempo ha dejado de tomarla? (Número de días)

---

**CABRAS**  
Cuántos Cabras?

---

Desde la última visita, ¿les ha dado antibióticos a su/su(s) cabra/cabras?

- a. Si  
 b. No  
 c. No sabe  
 d. Se rehúsa a responder

**DATOS MEDICINA CABRAS**  
Nombre de la Medicina/Antibiótico

---

Caja de la medicina o botella vista (si/no)

- Si  
 No

Se puede leer el nombre?

- Si  
 No

¿Con qué frecuencia les da esta medicina a sus animales?

- Cada mes  
 Cada tres meses  
 Cada 6 meses  
 Cada año  
 Cada vez que es necesario  
 No sabe  
 No responde

Después de darle antibióticos, ¿ha dejado de tomar la leche o comer la carne del animal indicado, después de darle antibióticos?

- SI  
 No

¿Durante cuánto tiempo ha dejado de tomarla? (Número de días)

---

**OTROS ANIMALES**  
Cuántos Otros Animales?

---

Desde la última visita, ¿les ha dado antibióticos a su/su(s) otro animales?

- a. Si  
 b. No  
 c. No sabe  
 d. Se rehúsa a responder

**DATOS MEDICINA OTROS ANIMALES**  
Nombre de la Medicina/Antibiótico

---

Caja de la medicina o botella vista (si/no)

- Si  
 No

Se puede leer el nombre?

- Si  
 No

Con qu  frecuencia les da esta medicina a sus animales?

- Cada mes  
 Cada tres meses  
 Cada 6 meses  
 Cada a ntildeo  
 Cada vez que es necesario  
 No sabe  
 No responde

Despu  de darle antibi ticos,   ha dejado de tomar la leche o comer la carne del animal indicado, despu  de darle antibi ticos?

- SI  
 No

Durante cuanto tiempo ha dejado de tomarla?  
(Numero de d as)

\_\_\_\_\_

10. Tiene alg n animal que vive adentro de la casa?

- a. Si  
 b. No

11. Por favor indique el tipo y numero de animales que viven libremente adentro de la casa. (MARQUE TODOS LOS QUE APLIQUEN indicando cantidad)

- a. Perros  
 b. Gatos  
 c. Pollos  
 d. Pavos  
 e. Patos  
 f. Gansos  
 g. Otros p acutearos  
 h. Cerdos  
 i. Vacas  
 j. Ovejas  
 k. Cabras  
 l. Otros animales  
 m. No sabe  
 n. Se reh a a responder

Cual otro animal?

\_\_\_\_\_

PERROS  
Cuantos Perros?

\_\_\_\_\_

En los  ltimos 6 meses les ha dado antibi ticos a su/sus perro/perros?

- a. Si  
 b. No  
 c. No sabe  
 d. Se reh a a responder

DATOS MEDICINA PERROS  
Nombre de la Medicina/Antibiotico

\_\_\_\_\_

Caja de la medicina o botella vista (si/no)

- Si  
 No

Se puede leer el nombre?

- Si  
 No

¿Con qué frecuencia les da esta medicina a sus animales?

- Cada mes  
 Cada tres meses  
 Cada 6 meses  
 Cada año  
 Cada vez que es necesario  
 No sabe  
 No responde

En los últimos 6 meses ha dejado de tomar la leche, comer los huevos o comer la carne del animal indicado, después de darle antibióticos?

- SI  
 No

Durante cuánto tiempo ha dejado de tomarla? (Número de días)

---

GATOS  
Cuántos Gatos?

---

En los últimos 6 meses les ha dado antibióticos a su/sus gato/gatos?

- a. Si  
 b. No  
 c. No sabe  
 d. Se rehúsa a responder

DATOS MEDICINA GATOS  
Nombre de la Medicina/Antibiótico

---

Caja de la medicina o botella vista (si/no)

- Si  
 No

¿Con qué frecuencia les da esta medicina a sus animales?

- Cada mes  
 Cada tres meses  
 Cada 6 meses  
 Cada año  
 Cada vez que es necesario  
 No sabe  
 No responde

Se puede leer el nombre?

- Si  
 No

En los últimos 6 meses ha dejado de tomar la leche, comer los huevos o comer la carne del animal indicado, después de darle antibióticos?

- SI  
 No

Durante cuánto tiempo ha dejado de tomarla? (Número de días)

---

PAVOS  
Cuántos Pavos?

---

En los últimos 6 meses les ha dado antibióticos a su/sus pavo/pavos?

- a. Si  
 b. No  
 c. No sabe  
 d. Se rehúsa a responder

## DATOS MEDICINA PAVOS

Nombre de la Medicina/Antibiotico

---

Caja de la medicina o botella vista (si/no)

- Si  
 No

Se puede leer el nombre?

- Si  
 No

¿Con qué frecuencia les da esta medicina a sus animales?

- Cada mes  
 Cada tres meses  
 Cada 6 meses  
 Cada año  
 Cada vez que es necesario  
 No sabe  
 No responde

¿En los últimos 6 meses ha dejado de tomar la leche, comer los huevos o comer la carne del animal indicado, después de darle antibióticos?

- SI  
 No

¿Durante cuánto tiempo ha dejado de tomarla? (Número de días)

---

## POLLOS

Cuantos Pollos?

---

¿En los últimos 6 meses les ha dado antibióticos a su/sus pollo/pollos?

- a. Si  
 b. No  
 c. No sabe  
 d. Se rehúsa a responder

## DATOS MEDICINA POLLOS

Nombre de la Medicina/Antibiotico

---

Caja de la medicina o botella vista (si/no)

- Si  
 No

Se puede leer el nombre?

- Si  
 No

¿Con qué frecuencia les da esta medicina a sus animales?

- Cada mes  
 Cada tres meses  
 Cada 6 meses  
 Cada año  
 Cada vez que es necesario  
 No sabe  
 No responde

¿En los últimos 6 meses ha dejado de tomar la leche, comer los huevos o comer la carne del animal indicado, después de darle antibióticos?

- SI  
 No

&iquestDurante cuanto tiempo ha dejado de tomarla?  
(Numero de d&iacute;as)

---

#### PATOS

Cuantos Patos?

---

&iquestEn los &uacute;ltimos 6 meses les ha dado  
antibi&oacute;ticos a su/sus patos/patos?

- a. Si  
 b. No  
 c. No sabe  
 d. Se reh&uacute;sa a responder

#### DATOS MEDICINA PATOS

Nombre de la Medicina/Antibiotico

---

Caja de la medicina o botella vista (si/no)

- Si  
 No

Se puede leer el nombre?

- Si  
 No

&iquestCon qu&eacute; frecuencia les da esta medicina  
a sus animales?

- Cada mes  
 Cada tres meses  
 Cada 6 meses  
 Cada a&ntilde;o  
 Cada vez que es necesario  
 No sabe  
 No responde

&iquestEn los &uacute;ltimos 6 meses ha dejado de  
tomar la leche, comer los huevos o comer la carne  
del animal indicado, despu&eacute;s de darle  
antibi&oacute;ticos?

- SI  
 No

&iquestDurante cuanto tiempo ha dejado de tomarla?  
(Numero de d&iacute;as)

---

#### GANSO

Cuantos Ganso?

---

&iquestEn los &uacute;ltimos 6 meses les ha dado  
antibi&oacute;ticos a su/sus ganso/gansos?

- a. Si  
 b. No  
 c. No sabe  
 d. Se reh&uacute;sa a responder

#### DATOS MEDICINA GANSOS

Nombre de la Medicina/Antibiotico

---

Caja de la medicina o botella vista (si/no)

- Si  
 No

Se puede leer el nombre?

- Si  
 No



¿Con qué frecuencia les da esta medicina a sus animales?

- Cada mes  
 Cada tres meses  
 Cada 6 meses  
 Cada año  
 Cada vez que es necesario  
 No sabe  
 No responde

En los últimos 6 meses ha dejado de tomar la leche, comer los huevos o comer la carne del animal indicado, después de darle antibióticos?

- SI  
 No

Durante cuánto tiempo ha dejado de tomarla? (Número de días)

---

PAJAROS  
Cuántos Pajaros?

---

En los últimos 6 meses les ha dado antibióticos a su/sus pajaros/pajaros?

- a. Si  
 b. No  
 c. No sabe  
 d. Se rehúsa a responder

DATOS MEDICINA PAJAROS  
Nombre de la Medicina/Antibiótico

---

Caja de la medicina o botella vista (si/no)

- Si  
 No

Se puede leer el nombre?

- Si  
 No

¿Con qué frecuencia les da esta medicina a sus animales?

- Cada mes  
 Cada tres meses  
 Cada 6 meses  
 Cada año  
 Cada vez que es necesario  
 No sabe  
 No responde

En los últimos 6 meses ha dejado de tomar la leche, comer los huevos o comer la carne del animal indicado, después de darle antibióticos?

- SI  
 No

Durante cuánto tiempo ha dejado de tomarla? (Número de días)

---

En los últimos 6 meses les ha dado antibióticos a su/sus cerdo/cerdos?

- a. Si  
 b. No  
 c. No sabe  
 d. Se rehúsa a responder

CERDOS  
Cuántos Cerdos?

---

## DATOS MEDICINA CERDOS

Nombre de la Medicina/Antibiotico \_\_\_\_\_

Caja de la medicina o botella vista (si/no)

- Si  
 No

Se puede leer el nombre?

- Si  
 No

¿Con qué frecuencia les da esta medicina a sus animales?

- Cada mes  
 Cada tres meses  
 Cada 6 meses  
 Cada año  
 Cada vez que es necesario  
 No sabe  
 No responde

¿En los últimos 6 meses ha dejado de tomar la leche, comer los huevos o comer la carne del animal indicado, después de darle antibióticos?

- SI  
 No

¿Durante cuánto tiempo ha dejado de tomarla? (Número de días)

\_\_\_\_\_

## VACAS

Cuantos Vacas? \_\_\_\_\_

¿En los últimos 6 meses les ha dado antibióticos a su/sus vaca/vacas?

- a. Si  
 b. No  
 c. No sabe  
 d. Se rehúsa a responder

## DATOS MEDICINA VACAS

Nombre de la Medicina/Antibiotico \_\_\_\_\_

Caja de la medicina o botella vista (si/no)

- Si  
 No

Se puede leer el nombre?

- Si  
 No

¿Con qué frecuencia les da esta medicina a sus animales?

- Cada mes  
 Cada tres meses  
 Cada 6 meses  
 Cada año  
 Cada vez que es necesario  
 No sabe  
 No responde

¿En los últimos 6 meses ha dejado de tomar la leche, comer los huevos o comer la carne del animal indicado, después de darle antibióticos?

- SI  
 No

&iquestDurante cuanto tiempo ha dejado de tomarla?  
(Numero de d&iacute;as)

---

OVEJAS  
Cuantos Ovejas?

---

&iquestEn los &uacute;ltimos 6 meses les ha dado  
antibi&oacute;ticos a su/sus oveja/ovejas?

- a. Si  
 b. No  
 c. No sabe  
 d. Se reh&uacute;sa a responder

DATOS MEDICINA OVEJAS  
Nombre de la Medicina/Antibiotico

---

Caja de la medicina o botella vista (si/no)

- Si  
 No

Se puede leer el nombre?

- Si  
 No

&iquestCon qu&eacute; frecuencia les da esta medicina  
a sus animales?

- Cada mes  
 Cada tres meses  
 Cada 6 meses  
 Cada a&ntilde;o  
 Cada vez que es necesario  
 No sabe  
 No responde

&iquestEn los &uacute;ltimos 6 meses ha dejado de  
tomar la leche, comer los huevos o comer la carne  
del animal indicado, despu&eacute;s de darle  
antibi&oacute;ticos?

- SI  
 No

&iquestDurante cuanto tiempo ha dejado de tomarla?  
(Numero de d&iacute;as)

---

CABRAS  
Cuantos Cabras?

---

&iquestEn los &uacute;ltimos 6 meses les ha dado  
antibi&oacute;ticos a su/sus cabra/cabras?

- a. Si  
 b. No  
 c. No sabe  
 d. Se reh&uacute;sa a responder

DATOS MEDICINA CABRA  
Nombre de la Medicina/Antibiotico

---

Caja de la medicina o botella vista (si/no)

- Si  
 No

Se puede leer el nombre?

- Si  
 No

¿Con qué frecuencia les da esta medicina a sus animales?

- Cada mes  
 Cada tres meses  
 Cada 6 meses  
 Cada año  
 Cada vez que es necesario  
 No sabe  
 No responde

En los últimos 6 meses ha dejado de tomar la leche, comer los huevos o comer la carne del animal indicado, después de darle antibióticos?

- SI  
 No

Durante cuánto tiempo ha dejado de tomarla? (Número de días)

---

#### OTRO ANIMALES

Cuántos otros animales?

---

En los últimos 6 meses les ha dado antibióticos a su/sus otros animales?

- a. Si  
 b. No  
 c. No sabe  
 d. Se rehúsa a responder

#### DATOS MEDICINA OTROS ANIMALES

Nombre de la Medicina/Antibiótico

---

Caja de la medicina o botella vista (si/no)

- Si  
 No

Se puede leer el nombre?

- Si  
 No

¿Con qué frecuencia les da esta medicina a sus animales?

- Cada mes  
 Cada tres meses  
 Cada 6 meses  
 Cada año  
 Cada vez que es necesario  
 No sabe  
 No responde

En los últimos 6 meses ha dejado de tomar la leche, comer los huevos o comer la carne del animal indicado, después de darle antibióticos?

- SI  
 No

Durante cuánto tiempo ha dejado de tomarla? (Número de días)

---

12. ¿Los animales a veces se quedan dentro de los cuartos en donde duermen los miembros de la familia (ya sea de día o de noche)? (MARQUE UNO)

- a. Si  
 b. No  
 c. No sabe  
 d. Se rehúsa a responder

13. Por favor indique quí animales se quedan a veces adentro de los cuartos donde duermen miembros de la familia (ya sea de noche o de día)? (MARQUE TODOS LOS QUE APLIQUEN indicando cantidad)

- a. Perros
- b. Gatos
- c. Pollos
- d. Pavos
- e. Patos
- f. Gansos
- g. Otros píjaros
- h. Cerdos
- i. Vacas
- j. Ovejas
- k. Cabras
- l. Otros animales
- m. No sabe
- n. Se rehísa a responder

a. Perros

\_\_\_\_\_

b. Gatos

\_\_\_\_\_

c. Pollos

\_\_\_\_\_

d. Pavos

\_\_\_\_\_

e. Patos

\_\_\_\_\_

f. Gansos

\_\_\_\_\_

g. Otros píjaros

\_\_\_\_\_

h. Cerdos

\_\_\_\_\_

i. Vacas

\_\_\_\_\_

j. Ovejas

\_\_\_\_\_

k. Cabras

\_\_\_\_\_

l. Otros, especificar

\_\_\_\_\_

# Cuestionario Adultos

I. Buenos días/tardes, mi nombre es (NOMBRE PERSONA HABLANDO) y vengo hoy con mi compañero de trabajo (NOMBRE COMPAÑERO DEL TRABAJO). Estamos visitando su casa el día de hoy porque estamos realizando la segunda fase del estudio sobre la resistencia a los antibióticos. ¿Es posible hablar con [NOMBRE DE LA PERSONA QUE PARTICIPÓ ANTERIORMENTE] para hacerle unas preguntas y coleccionar nuevamente la muestra de heces?

1. Usted está enfermo el día de hoy con diarrea, fiebre aguda o una enfermedad respiratoria?

2. Usted está tomando algún medicamento el día de hoy?

3. Nos puede enseñar que medicamento está tomando (la caja, sobre o blister)?

3.1 Nos puede decir cuál medicamento está tomando?

3.2. ¿El medicamento que está tomando hoy es un antibiótico?

- a. Sí- continuar al II
- b. No, [NOMBRE DE LA PERSONA ELIGIDA] no está. Preguntar a qué hora pueden regresar para hablar con la persona que participó anteriormente..
- c. Persona se niega a participar en la segunda fase.

- a. Sí- Finalizado. Deberá regresar a hablar con este participante en una semana.
- b. No

- a. Sí
- b. No

- a. Sí
- b. No, no lo puede mostrar

- a. Sí. Consultar el listado para ver si se trata de un antibiótico. Si está en la lista de antibióticos no puede participar hoy; usted deberá regresar a hablar con este participante cuando ya no esté tomando antibiótico (preguntarle cuándo). Si no está en la lista, llamar a Puri o Brooke para aclarar si se trata de un antibiótico o no.
- b. No, no lo puede decir. Finalizado.

- Si. Regresar al cabo de una semana.
- No

INFORMACIÓN DEMOGRÁFICA del representante del hogar

1. Código/identificación (xxx-xx)

\_\_\_\_\_

Latitud

\_\_\_\_\_

Longitud

\_\_\_\_\_

2. Localidad

- Coatepeque
- San Juan Ostuncalco

a. Coatepeque (listado definido de opciones)

- a. El Jardín
- b. La Unión

b. San Juan Ostuncalco (listado definido de opciones)

1. Casco Urbano
2. Monrovia

3. Sexo

- a. Masculino
- b. Femenino

I. Enfermedades Previas-Diarrea, Febriles y Respiratoria: Ahora quisiera preguntarle sobre eventos previos de enfermedad diarreica, febril o respiratoria..

4. ¿En los últimos 14 días, ha tenido diarrea?

- a. Sí  
 b. No  
 c. No sabe  
 d. Se rehúsa a responder

5. ¿Tomó algún medicamento para tratar este episodio de diarrea/asientos?

- a. Sí  
 b. No  
 c. No sabe  
 d. Se rehúsa a responder

6. ¿Qué medicamentos tomó para tratar este episodio de diarrea/asientos?

- a. Antibióticos  
 b. Analgésicos (medicamentos para el dolor)  
 c. Desparasitantes/antihelmínticos  
 d. Remedios de hierbas, especificar  
 e. Otros,  
 f. Ninguno

Nombre del otro medicamento

\_\_\_\_\_

Remedios de hierbas:

\_\_\_\_\_

7. ¿En los últimos 14 días, ha tenido fiebre?

- a. Sí  
 b. No  
 c. No sabe  
 d. Se rehúsa a responder

8. ¿Tomó algún medicamento para tratar este episodio de fiebre?

- a. Sí  
 b. No  
 c. No sabe  
 d. Se rehúsa a responder

9. ¿Qué medicamentos tomó para tratar este episodio de fiebre?

- a. Antibióticos  
 b. Analgésicos (medicamentos para el dolor)  
 c. Desparasitantes/antihelmínticos  
 d. Remedios de hierbas, especificar  
 e. Otros  
 f. Ninguno

Nombre del otro medicamento

\_\_\_\_\_

Remedios de hierbas:

\_\_\_\_\_

10. En los últimos 14 días, ¿ha tenido gripe, tos o algún síntoma respiratorio?

- a. Sí  
 b. No  
 c. No sabe  
 d. Se rehúsa a responder

11. ¿Tomó algún medicamento para tratar este episodio de gripe/tos?

- a. Sí  
 b. No  
 c. No sabe  
 d. Se rehúsa a responder

12. ¿Qué medicamentos tomó para tratar este episodio de gripe/tos?

- a. Antibióticos  
 b. Analgésicos (medicamentos para el dolor)  
 c. Desparasitantes/antihelmínticos  
 d. Remedios de hierbas, especificar  
 e. Otros  
 f. Ninguno

Nombre del otro medicamento

\_\_\_\_\_

Remedios de hierbas:

\_\_\_\_\_

## II. Historia de uso anti&amp;ocutetico

En la siguiente secci&ocuten de la encuesta le preguntaremos sobre el uso de medicamentos, especialmente, el uso de anti&ocuteticos. Los anti&ocuteticos se definen como medicamentos usados para matar las bacterias. Las bacterias son microorganismos que causan infecciones. Los anti&ocuteticos se venden en las farmacias de Guatemala y algunas veces en tiendas y supermercados. El Ministerio de Salud P&uacute;blica tambi&eacuten proporciona anti&ocuteticos a los que tienen una receta de un m&eacute;dicado del MSPAS. Los anti&ocuteticos m&eacute;as comunes son amoxicilina y tetraciclina (mostrar ejemplos adquiridos del ministerio de salud y tiendas cercanas) y frecuentemente se recomiendan despu&eacute;s de visitar al doctor. Algunas veces, las personas deciden tomar anti&ocuteticos sin tener la recomendaci&ocuten del doctor.

13. ¿Guarda la bolsa de medicamentos que le entregamos la &uacute;ltima vez que estuvimos aqu&iacute?

- a. Si  
 b. No  
 c. No sabe  
 d. Se reh&uacute;sa a responder

¿Cu&acuten medicamentos hay en la bolsa (Cajas, empaques individuales, bl&iacute;ster, jarabe, etc.)? \_\_\_\_\_

14. Documentaci&ocuten de medicamentos y foto: ENCUESTADOR: Por favor anote los datos de cada empaque o medicamento individual que est&acuten en la bolsa.

MEDICAMENTO 1

Especifique Marca? \_\_\_\_\_

Especifique Principio Activo? \_\_\_\_\_

Especifique Forma farmac&eacute;utica (tableta / c&acutespula / jarabe / inetable / supositorio / otro)? \_\_\_\_\_

Especifique Dosis? \_\_\_\_\_

MEDICAMENTO 2

Especifique Marca? \_\_\_\_\_

Especifique Principio Activo? \_\_\_\_\_

Especifique Forma farmac&eacute;utica (tableta / c&acutespula / jarabe / inetable / supositorio / otro)? \_\_\_\_\_

Especifique Dosis? \_\_\_\_\_

MEDICAMENTO 3

Especifique Marca? \_\_\_\_\_

Especifique Principio Activo? \_\_\_\_\_

Especifique Forma farmac&eacute;utica (tableta / c&acutespula / jarabe / inetable / supositorio / otro)? \_\_\_\_\_

Especifique Dosis? \_\_\_\_\_

MEDICAMENTO 4

Especifique Marca? \_\_\_\_\_

Especifique Principio Activo? \_\_\_\_\_



Especifique Forma farmacéutica (tableta /  
cápsula / jarabe / inyectable / supositorio /  
otro)?

---

Especifique Dosis?

---

MEDICAMENTO 5  
Especifique Marca?

---

Especifique Principio Activo?

---

Especifique Forma farmacéutica (tableta /  
cápsula / jarabe / inyectable / supositorio /  
otro)?

---

Especifique Dosis?

---

Ahora le haré unas preguntas sobre los antibióticos que estén en la bolsa (ENCUESTADOR:  
Corroborar con la lista de antibióticos.); si no hay bolsa o en la bolsa no hay antibióticos le  
pediré que me indique si ha tomado alguno de estos antibióticos desde la última vez que  
estuvimos aquí (enseñarle el bulto).

15. ¿Ha tomado antibióticos desde la  
última vez que estuvimos aquí?  
(Incluyendo los de la bolsa)

- a. Si  
 b. No  
 c. No sabe  
 d. Se rehúsa a responder

¿Cuántos antibióticos ha tomado  
desde la última vez que estuvimos aquí,  
incluyendo los de la bolsa y otros que no haya  
guardado en la bolsa?

---

16. Para cada antibiótico complete la siguiente tabla:

DATOS MEDICINA No 1  
Nombre de la medicina (1)

---

¿Se examinó el paquete o botella?

- Si  
 No

¿El nombre del medicamento se puede leer?

- Si  
 No

La última vez que tomé un antibiótico,  
para qué enfermedad lo tomé? (puede  
seleccionar más de una)

- a. Nariz congestionada  
 b. Tos  
 c. Dolor de cabeza  
 d. Fiebre  
 e. Vómitos  
 f. Diarrea  
 g. Heridas de la piel  
 h. Malaria  
 i. VIH  
 j. Zika  
 k. Dengue  
 l. Chikungunya  
 m. Tuberculosis  
 n. Otro. Especificar.  
 o. No Sabe  
 p. Se rehúsa a responder

Otro

---

¿Le recetaron este medicamento en un puesto/centro/clínica privada de salud?

- Sí  
 No  
 No se  
 No Responde

Indique en qué lugar se le recetó/recomendó.

- Centro de salud MSPAS  
 Puesto de salud/Clínica privada

Si no, ¿cómo sabía qué medicamento comprar?

- Amigo o familiar  
 Experiencia previa  
 Persona en la farmacia  
 Médico  
 Otro

Especifique otro...

---

¿En dónde consiguió el medicamento?

- Farmacia  
 Tienda  
 Super  
 MSPAS  
 Amigo o familiar  
 Comadronas  
 Curanderos  
 Otros

¿Cuántas veces tomó el medicamento?

---

¿Con qué frecuencia toma este medicamento?

- Cada mes  
 Cada tres meses  
 Cada 6 meses  
 Cada año  
 Cada vez que es necesario  
 No sabe  
 No responde

Además de usted, ¿usó otra persona o animal este medicamento?

- Sí  
 No

¿Qué otra persona o animal usó este medicamento?

---

DATOS MEDICINA No 2  
Nombre de la medicina (2)

---

¿Se examinó el paquete o botella?

- Sí  
 No

¿El nombre del medicamento se puede leer?

- Sí  
 No

La ultima vez que tom&ocute un antibi&ocutetico, para qu&eacute; enfermedad lo tom&ocute? (puede seleccionar mas de una)

- a. Nariz congestionada
- b. Tos
- c. Dolor de cabeza
- d. Fiebre
- e. V&ocutemitos
- f. Diarrea
- g. Heridas de la piel
- h. Malaria
- i. VIH
- j. Zika
- k. Dengue
- l. Chikungunya
- m. Tuberculosis
- n. Otro. Especificar.
- o. No Sabe
- p. Se reh&uacutesa a responder

Otro

&iquestLe recetaron este medicamento en un puesto/centro/cl&iacutenica privada de salud?

- Si
- No
- No se
- No Responde

Indique en qu&eacute; lugar se le recet&ocute/recomend&ocute.

- Centro de salud MSPAS
- Puesto de salud/Cl&iacutenica privada

Si no, &iquestC&ocutemo sabia qu&eacute; medicamento comprar?

- Amigo o familiar
- Experiencia previa
- Persona en la farmacia
- M&eacutedico
- Otro

Especifique otro...

&iquestEn donde consigui&ocute el medicamento?

- Farmacia
- Tienda
- Super
- MSPAS
- Amigo o familiar
- Comadronas
- Curanderos
- Otros

&iquestCuantos d&iacuteas tomo el medicamento?

&iquestCon que frecuencia toma este medicamento?

- Cada mes
- Cada tres meses
- Cada 6 meses
- Cada a&ntildeo
- Cada vez que es necesario
- No sabe
- No responde

Ademas de usted, &iquestuso otra persona o animal este medicamento?

- SI
- No

&iquestQu&eacute; otra persona o animal us&ocute este medicamento?

DATOS MEDICINA No 3  
Nombre de la medicina (3)

---

¿Se examinó el paquete o botella?

- Si  
 No

¿El nombre del medicamento se puede leer?

- Si  
 No

La última vez que tomó un antibiótico, ¿para qué enfermedad lo tomó? (puede seleccionar más de una)

- a. Nariz congestionada  
 b. Tos  
 c. Dolor de cabeza  
 d. Fiebre  
 e. Vómitos  
 f. Diarrea  
 g. Heridas de la piel  
 h. Malaria  
 i. VIH  
 j. Zika  
 k. Dengue  
 l. Chikungunya  
 m. Tuberculosis  
 n. Otro. Especificar.  
 o. No Sabe  
 p. Se rehúsa a responder

Otro

---

¿Le recetaron este medicamento en un puesto/centro/clínica privada de salud?

- Si  
 No  
 No se  
 No Responde

Indique en qué lugar se le recetó/recomendó.

- Centro de salud MSPAS  
 Puesto de salud/Clínica privada

Si no, ¿cómo sabía qué medicamento comprar?

- Amigo o familiar  
 Experiencia previa  
 Persona en la farmacia  
 Médico  
 Otro

Especifique otro...

---

¿En dónde consiguió el medicamento?

- Farmacia  
 Tienda  
 Super  
 MSPAS  
 Amigo o familiar  
 Comadronas  
 Curanderos  
 Otros

¿Cuántas veces tomó el medicamento?

---

&iquestCon que frecuencia toma este medicamento?

- Cada mes
- Cada tres meses
- Cada 6 meses
- Cada a&ntildeo
- Cada vez que es necesario
- No sabe
- No responde

Ademas de usted, &iquestuso otra persona o animal este medicamento?

- SI
- No

&iquestQu&eacute; otra persona o animal us&oacute; este medicamento?

---

III. Exposici&oacute;n a hospitales y servicios de salud: Ahora quisiera hacerle unas preguntas sobre si ha visitado el hospital o servicio de salud.

17. &iquestUsted trabaja en el hospital?

- a.Si
- b.No

18. &iquestEn los &uacute;ltimos 3 meses, ha visitado el hospital por alguna raz&oacute;n?

- a. Si
- b. No
- c. No sabe
- d. Reh&uacute;tesa

19. &iquestPor que visito el hospital?

- a. Para hacer un tramite
- b. para visitar a un paciente internado/Acompa&ntildear a un familiar
- c. Para un chequeo m&eacute;dico rutinario
- d. Para recibir un tratamiento
- e. Porque estaba enfermo y me internaron
- f. Otro
- g. No sabe
- h. Se reh&uacute;tesa a responder

Otro

---

20. En los &uacute;ltimos 3 meses, &iquestha visitado el centro de salud por alguna raz&oacute;n?

- a. Si
- b. No
- c. No sabe
- d. Se reh&uacute;tesa a responder

21. &iquestPor que visito el centro de salud?

- a. Para hacer un tramite
- b. para visitar a un paciente internado/Acompa&ntildear a un familiar
- c. Para un chequeo m&eacute;dico rutinario
- d. para recibir un tratamiento
- e. porque estaba enferma y me internaron
- f. Otro, especificar
- g. No sabe
- h. Se reh&uacute;tesa a responder

Otro

---

# Cuestionario Niño menor de 5 Años

I. Gracias por su participación en el proyecto. Como le comentamos al principio, también estamos interesados en la participación en la segunda fase de \_\_\_\_\_ (el mismo niño(a) que participó la primera vez). ¿Podemos hablar con \_\_\_\_\_ (nombre de la persona que dio el consentimiento por el niño(a))?

1. ¿El niño(a) está enfermo el día de hoy con diarrea, fiebre aguda o una enfermedad respiratoria severa?

2. ¿El niño(a) está tomando algún medicamento el día de hoy?

3. ¿Nos puede enseñar qué medicamento está tomando el/la niño(a) (la caja, sobre o blíster)?

3.1 ¿Nos puede decir cuál medicamento está tomando?

3.2. ¿El medicamento que está tomando hoy es un antibiótico?

- a. Sí- continuar a la pregunta 1.
- b. No, no está la persona que dio el consentimiento por el/la niño(a). Preguntar a qué hora pueden regresar para hablar con la persona que participó anteriormente.
- c. Persona se niega a participar en la segunda fase- terminar.
- a. Sí- Solicitar al participante que le llame cuando el/la niño(a) se mejore. De no recibir una llamada, deberá regresar a hablar con este participante en una semana.
- b. No
- a. Sí
- b. No
- Sí, consultar el listado para ver si se trata de un antibiótico. Si está en la lista de antibióticos no puede participar hoy; usted deberá regresar a hablar con el padre o madre de este participante cuando ya no está tomando antibiótico (preguntarle cuando). Si no está en la lista, llamar a Puri y Brooke para aclarar si se trata de un antibiótico o no.
- No, no lo puede mostrar
- a. Sí, consultar el listado para ver si se trata de un antibiótico. Si está en la lista de antibióticos no puede participar hoy; usted deberá regresar a hablar con el padre o madre de este participante cuando ya no está tomando antibiótico (preguntarle cuando). Si no está en la lista, llamar a Puri y Brooke para aclarar si se trata de un antibiótico o no.
- b. No, no lo puede mostrar.
- Sí
- No

---

## INFORMACIÓN DEMOGRÁFICA del niño(a) participante

1. Código/identificación (xxx-xx) \_\_\_\_\_

Latitud \_\_\_\_\_

Longitud \_\_\_\_\_

2. Localidad

- Coatepeque
- San Juan Ostuncalco

a. Coatepeque (listado definido de opciones)

- a. El Jardín
- b. La Unión

b. San Juan Ostuncalco (listado definido de opciones)

1. Casco Urbano
2. Monrovia

3. Sexo

- a. Masculino  
 b. Femenino

**I. Prácticas de la vivienda incluyendo posesión de animales, métodos de cocción y dieta**

**Sección 1 ENCUESTADOR LEA: Muchas gracias. Ahora quiero hacerle unas preguntas sobre varias condiciones en su hogar, que aplican al niño. Estas preguntas las hacemos en cada casa que visitamos, y a cada participante que encuestamos. Comencemos con preguntas sobre la comida del niño.**

4. ¿El niño come carne?

- a. Si  
 b. No  
 c. No sabe  
 d. Se resiste a responder

5. ¿Qué tipo de carne? (puede responder a varios)

- a. Pollo  
 b. Carne de cerdo  
 c. Carne de res  
 d. Pescado  
 e. Conejo  
 f. Chompipe  
 g. Pato  
 h. Otro, indique  
 i. No sabe  
 j. Se resiste a responder

¿Qué otro tipo de carne?

\_\_\_\_\_

6. Indique la procedencia de cada tipo de carne que el niño come

- a. Criado en la casa  
 b. Comprado en el mercado  
 c. Comprado en el supermercado  
 d. Comprado en la despensa  
 e. Comprado en la tienda  
 f. Otro, especificar  
 g. No sabe  
 h. Se resiste a responder

Otro

\_\_\_\_\_

7. ¿El niño toma leche?

- a. Si  
 b. No  
 c. No sabe  
 d. Se resiste a responder

8. ¿Qué tipo de leche toma? (MARQUE TODOS LOS QUE APLIQUEN )

- a. Leche Materna  
 b. Leche de vaca (en fresco)  
 c. Leche en polvo  
 d. Leche en caja  
 e. Leche de cabra (en fresco)  
 f. Leche en bolsa  
 g. Otro

Otro

\_\_\_\_\_

9. ¿Trata (o prepara) de alguna forma la leche de vaca o cabra (en fresco) antes de tomarla?

- a. Si  
 b. No  
 c. No sabe  
 d. Se rehúsa a responder

10. ¿Hierve la leche antes de tomarla?

- a. Si  
 b. No  
 c. No sabe  
 d. Se rehúsa a responder

---

**II. Enfermedades Previas-Diarrea y exposición a hospitales: Ahora quisiera preguntarle sobre eventos previos de enfermedad diarreica del niño.**

11. En los últimos 14 días, ha tenido diarrea el niño?

- a. Si  
 b. No  
 c. No sabe  
 d. Se rehúsa a responder

12. El niño tomó algún medicamento para tratar este episodio de diarrea/asientos?

- a. Si  
 b. No  
 c. No sabe  
 d. Se rehúsa a responder

13. ¿Qué medicamentos tomó el niño para tratar este episodio de diarrea/asientos?

- a. Antibióticos  
 b. Analgésicos (medicamentos para el dolor)  
 c. Desparasitantes/antihelmínticos  
 d. Remedios de hierbas, especificar  
 e. Otros,  
 f. Ninguno

Nombre del otro medicamento

\_\_\_\_\_

Remedios de hierbas:

\_\_\_\_\_

14. En los últimos 14 días, ha tenido fiebre el niño?

- a. Si  
 b. No  
 c. No sabe  
 d. Se rehúsa a responder

15. El niño tomó algún medicamento para tratar este episodio de fiebre?

- a. Si  
 b. No  
 c. No sabe  
 d. Se rehúsa a responder

16. ¿Qué medicamentos tomó el niño para tratar este episodio de fiebre?

- a. Antibióticos  
 b. Analgésicos (medicamentos para el dolor)  
 c. Desparasitantes/antihelmínticos  
 d. Remedios de hierbas, especificar  
 e. Otros  
 f. Ninguno

Nombre del otro medicamento

\_\_\_\_\_

Remedios de hierbas:

\_\_\_\_\_

17. En los últimos 14 días, ¿ha tenido el niño gripe, tos o algún síntoma respiratorio?

- a. Si  
 b. No  
 c. No sabe  
 d. Se rehúsa a responder



18. ¿IcstEl ni&ntildeo tom&ocute alg&uacuten medicamento para tratar este episodio de gripe/tos?

- a. Si  
 b. No  
 c. No sabe  
 d. Se reh&uacutesa a responder

19. ¿IcstQue medicamentos tom&ocute el ni&ntildeo para tratar este episodio de gripe/tos?

- a. Antibi&ocuteticos  
 b. Analg&eacutesicos (medicamentos para el dolor)  
 c. Desparasitantes/antihelm&iacutenticos  
 d. Remedios de hierbas, especificar  
 e. Otros  
 f. Ninguno

Nombre del otro medicamento \_\_\_\_\_

Remedios de hierbas: \_\_\_\_\_

### III. □ Historia de uso antibi&ocutetico

**En la siguiente secci&ocuten de la encuesta le preguntaremos sobre el uso de medicamentos, especialmente, el uso de antibi&ocuteticos por el ni&ntildeo. Los antibi&ocuteticos se definen como medicamentos usados para matar las bacterias. Las bacterias son microorganismos que causan infecciones. Los antibi&ocuteticos se venden en las farmacias de Guatemala y algunas veces en tiendas y supermercados. El Ministerio de Salud P&uacuteblica tambi&eacuten proporciona antibi&ocuteticos a los que tienen una receta de un m&eacutedico del MSPAS. Los antibi&ocuteticos m&aacutes comunes son amoxicilina y tetraciclina (mostrar ejemplos adquiridos del ministerio de salud y tiendas cercanas) y frecuentemente se recomiendan despu&eacutes de visitar al doctor. Algunas veces, las personas deciden tomar o darles antibi&ocuteticos a sus ni&ntildeos sin tener la recomendaci&ocuten del doctor.**

20. ¿IcstGuard&ocute la bolsa de medicamentos que le entregamos la &uacutelima vez que estuvimos aqu&iacute?

- a. Si  
 b. No  
 c. No sabe  
 d. Se reh&uacutesa a responder

¿IcstCu&aacutenos medicamentos hay en la bolsa (Cajas, empaques individuales, bl&iacutester, jarabe, etc.)? \_\_\_\_\_

21. Documentaci&ocuten de medicamentos y foto: ENCUESTADOR: Por favor anote los datos de cada empaque o medicamento individual que est&aacute en la bolsa.

MEDICAMENTO 1  
Especifique Marca? \_\_\_\_\_

Especifique Principio Activo? \_\_\_\_\_

Especifique Forma farmac&eacutetica (tableta / c&aacutepsula / jarabe / inetable / supositorio / otro)? \_\_\_\_\_

Especifique Dosis? \_\_\_\_\_

MEDICAMENTO 2  
Especifique Marca? \_\_\_\_\_

Especifique Principio Activo?

---

Especifique Forma farmacéutica (tableta /  
cápsula / jarabe / inyectable / supositorio /  
otro)?

---

Especifique Dosis?

---

MEDICAMENTO 3

Especifique Marca?

---

Especifique Principio Activo?

---

Especifique Forma farmacéutica (tableta /  
cápsula / jarabe / inyectable / supositorio /  
otro)?

---

Especifique Dosis?

---

MEDICAMENTO 4

Especifique Marca?

---

Especifique Principio Activo?

---

Especifique Forma farmacéutica (tableta /  
cápsula / jarabe / inyectable / supositorio /  
otro)?

---

Especifique Dosis?

---

MEDICAMENTO 5

Especifique Marca?

---

Especifique Principio Activo?

---

Especifique Forma farmacéutica (tableta /  
cápsula / jarabe / inyectable / supositorio /  
otro)?

---

Especifique Dosis?

---

Ahora le haré unas preguntas sobre los antibióticos que estén en la bolsa (ENCUESTADOR:  
Corroborar con la lista de antibióticos.); si no hay bolsa o en la bolsa no hay antibióticos le  
pediré que me indique si ha tomado alguno de estos antibióticos desde la última visita  
(enseñarle el álbum).

22. ¿El niño ha tomado antibióticos  
desde la última visita? (Incluyendo los de la  
bolsa)

- a. Si  
 b. No  
 c. No sabe  
 d. Se rehúsa a responder

¿Cuántos antibióticos ha tomado  
desde la última visita, incluyendo los de la  
bolsa y otros que no haya guardado en la bolsa?

---

23. Para cada antibiótico complete la siguiente tabla:

DATOS MEDICINA No 1

Nombre de la medicina (1)

---

¿Se examinó el paquete o botella?

- Si  
 No

&questEl nombre del medicamento se puede leer?

- Si  
 No

La ultima vez que tomo un antibi&ocutetico, para que enfermedad lo tomo? (puede seleccionar mas de una)

- a. Nariz congestionada  
 b. Tos  
 c. Dolor de cabeza  
 d. Fiebre  
 e. V&ocutemitos  
 f. Diarrea  
 g. Heridas de la piel  
 h. Malaria  
 i. VIH  
 j. Zika  
 k. Dengue  
 l. Chikungunya  
 m. Tuberculosis  
 n. Otro. Especificar.  
 o. No Sabe  
 p. Se reh&uacutesa a responder

Otro

&questLe recetaron este medicamento en un puesto/centro/cl&iacutenica privada de salud?

- Si  
 No  
 No se  
 No Responde

&questEn que lugar se le receto?

- Centro de salud MSPAS  
 Puesto de salud/Cl&iacutenica privada

Si no, &questComo sabia que medicamento comprar?

- Amigo o familiar  
 Experiencia previa  
 Persona en la farmacia  
 M&eacutedico  
 Otro

Especifique otro...

&questEn donde consigui&ocute el medicamento?

- Farmacia  
 Tienda  
 Super  
 MSPAS  
 Amigo o familiar  
 Comadronas  
 Curanderos  
 Otros

&questCuantos d&iacuteas tomo el medicamento?

&questCon que frecuencia toma este medicamento?

- Cada mes  
 Cada tres meses  
 Cada 6 meses  
 Cada a&ntildeo  
 Cada vez que es necesario  
 No sabe  
 No responde

Ademas de usted, &questuso otra persona o animal este medicamento?

- SI  
 No

&questQu&eacute; otra persona us&ocute este medicamento?

DATOS MEDICINA No 2  
Nombre de la medicina (2)

---

¿Se examinó el paquete o botella?

- Si  
 No

¿El nombre del medicamento se puede leer?

- Si  
 No

La última vez que tomo un antibiótico, para que enfermedad lo tomo? (puede seleccionar más de una)

- a. Nariz congestionada  
 b. Tos  
 c. Dolor de cabeza  
 d. Fiebre  
 e. Vómitos  
 f. Diarrea  
 g. Heridas de la piel  
 h. Malaria  
 i. VIH  
 j. Zika  
 k. Dengue  
 l. Chikungunya  
 m. Tuberculosis  
 n. Otro. Especificar.  
 o. No Sabe  
 p. Se rehúsa a responder

Otro

---

¿Le recetaron este medicamento en un puesto/centro/clínica privada de salud?

- Si  
 No  
 No se  
 No Responde

Indique en qué lugar se le recetó/recomendó

- Centro de salud MSPAS  
 Puesto de salud/Clínica privada

Si no, ¿cómo sabía que medicamento comprar?

- Amigo o familiar  
 Experiencia previa  
 Persona en la farmacia  
 Médico  
 Otro

Especifique otro...

---

¿En dónde consiguió el medicamento?

- Farmacia  
 Tienda  
 Super  
 MSPAS  
 Amigo o familiar  
 Comadronas  
 Curanderos  
 Otros

¿Cuántas veces tomo el medicamento?

---

&quest;Con que frecuencia toma este medicamento?

- Cada mes  
 Cada tres meses  
 Cada 6 meses  
 Cada añeo  
 Cada vez que es necesario  
 No sabe  
 No responde

Ademas de usted, &quest;uso otra persona o animal este medicamento?

- SI  
 No

&quest;Qu&eacute; otra persona us&oacute; este medicamento?

---



---

DATOS MEDICINA No 3  
Nombre de la medicina (3)

&quest;Se examin&oacute; paquete o botella?

- Si  
 No

&quest;El nombre del medicamento se puede leer?

- Si  
 No

La ultima vez que tomo un antibi&oacute;tico, para que enfermedad lo tomo? (puede seleccionar mas de una)

- a. Nariz congestionada  
 b. Tos  
 c. Dolor de cabeza  
 d. Fiebre  
 e. V&oacute;mitos  
 f. Diarrea  
 g. Heridas de la piel  
 h. Malaria  
 i. VIH  
 j. Zika  
 k. Dengue  
 l. Chikungunya  
 m. Tuberculosis  
 n. Otro. Especificar.  
 o. No Sabe  
 p. Se reh&uacute;sa a responder

Otro

---

&quest;Le recetaron este medicamento en un puesto/centro/cl&iacute;nica privada de salud?

- Si  
 No  
 No se  
 No Responde

Indique en qu&eacute; lugar se le recet&oacute;/recoend&oacute;.

- Centro de salud MSPAS  
 Puesto de salud/Cl&iacute;nica privada

Si no, &quest;Como sabia que medicamento comprar?

- Amigo o familiar  
 Experiencia previa  
 Persona en la farmacia  
 M&eacute;dico  
 Otro

Especifique otro...

---

&iquestEn donde consigui&oacute el medicamento?

- Farmacia
- Tienda
- Super
- MSPAS
- Amigo o familiar
- Comadronas
- Curanderos
- Otros

&iquestCuantos d&iacuteas tomo el medicamento?

---

&iquestCon que frecuencia toma este medicamento?

- Cada mes
- Cada tres meses
- Cada 6 meses
- Cada a&ntildeo
- Cada vez que es necesario
- No sabe
- No responde

Ademas de usted, &iquestuso otra persona o animal este medicamento?

- SI
- No

&iquestQu&eacute otra persona us&oacute este medicamento?

---

24. &iquestEn los &uacuteltimos 3 meses, &iquestel ni&ntildeo ha visitado el hospital por alguna raz&oacuten?

- a. Si
- b. No
- c. No sabe
- d. Reh&uacutetesa

25. &iquestPor que visito el ni&ntildeo el hospital?

- a. Para hacer un tramite acompa&ntildeando a un adulto
- b. para visitar a un paciente internado/Acompa&ntildear a un familiar
- c. Para un chequeo m&eacute;dico rutinario
- d. Para recibir un tratamiento
- e. Porque estaba enfermo y me internaron
- f. Otro
- g. No sabe
- h. Se reh&uacutetesa a responder

Otro

---

26. En los &uacuteltimos 3 meses, &iquestel ni&ntildeo ha visitado el centro de salud por alguna raz&oacuten?

- a. Si
- b. No
- c. No sabe
- d. Se reh&uacutetesa a responder

27. &iquestPor que visito el ni&ntildeo el centro de salud?

- a. Para hacer un tramite
- b. para visitar a un paciente internado/Acompa&ntildear a un familiar
- c. Para un chequeo m&eacute;dico rutinario
- d. para recibir un tratamiento
- e. porque estaba enferma y me internaron
- f. Otro, especificar
- g. No sabe
- h. Se reh&uacutetesa a responder

Otro

---

# Consentimiento Informado

## CONSENTIMIENTO INFORMADO VERBAL PARA LA REVISIÓN DE LOS RESULTADOS DE LABORATORIO CON LOS PARTICIPANTES

Hola, mi nombre es \_\_\_\_ y estoy hoy aquí para darle los resultados del examen de parásitos que le hicimos a la muestra de heces que recolectamos para el proyecto AMR-UVG. Me gustaría pedirle permiso para revisar los resultados de este examen con usted, para asegurarnos que entiende lo que dicen los resultados y responder a las preguntas que usted pueda tener sobre la búsqueda de atención en los servicios de salud, en el caso de que lo necesitara. No voy a copiar los resultados de su examen, los resultados son estrictamente confidenciales. No voy a compartir su información personal de salud con nadie en la comunidad ni de mi equipo a no ser que usted me lo pida.

Revisar los resultados va a tomar aproximadamente 10 minutos. ¿Me permite revisarlos con usted?

- Sí. Revisar con el participante.
- No. Dar el sobre sellado sin revisar los resultados. Explicar que alguien del centro o puesto de salud puede ayudar a interpretar el significado de los resultados.

## Muestras de laboratorio Adultos

C&ocutedigo \_\_\_\_\_

Lugar de origen

- La Union  
 El jardin  
 San Juan Ostuncalco  
 Monrovia

Muestra de Heces

- Si  
 No

Fecha y hora de recolecci&ocuten (Trabajador de Campo)

\_\_\_\_\_

Fecha y hora de recepci&ocuten en sitio de Hospital

\_\_\_\_\_

---

### Procesamiento en laboratorio

Heces entera

- Si  
 No

Fecha de elaboraci&ocuten

\_\_\_\_\_

Recepci&ocuten Laboratorio UVG

\_\_\_\_\_

Heces liquida almacenada en crio tubo

- Si  
 No

Fecha de elaboraci&ocuten

\_\_\_\_\_

Recepci&ocuten Laboratorio UVG

\_\_\_\_\_

Placa MacConkey para aislamiento de E. coli

- Si  
 No

Fecha de elaboraci&ocuten

\_\_\_\_\_

Recepci&ocuten Laboratorio UVG

\_\_\_\_\_

Placa de 96 pocillos con caldo LB

- Si  
 No

Fecha de elaboraci&ocuten

\_\_\_\_\_

Recepci&ocuten Laboratorio UVG

\_\_\_\_\_

Placas MacConkey con antibi&ocuteticos

- Si  
 No

Fecha de elaboraci&ocuten

\_\_\_\_\_

Fecha de elaboraci&ocuten

\_\_\_\_\_



---

---

**Pruebas de parásitos**

¿Se realizo la prueba de parásitos?

- Si
- No

Fecha en que se realizo la prueba de parásitos

\_\_\_\_\_

¿Resultado de prueba de parásitos?

- Helmintos
- Protozoos
- Ambos
- Negativo

Observaciones

\_\_\_\_\_

# Muestras de laboratorio Menores de 5 Años

C&ocutedigo \_\_\_\_\_

Lugar de origen

- La Union  
 El jardin  
 San Juan Ostuncalco  
 Monrovia

Muestra de Heces

- Si  
 No

Fecha y hora de recolecci&ocuten (Trabajador de Campo)

\_\_\_\_\_

Fecha y hora de recepci&ocuten en sitio de Hospital

\_\_\_\_\_

---

## Procesamiento en laboratorio

Heces entera

- Si  
 No

Fecha de elaboraci&ocuten

\_\_\_\_\_

Recepci&ocuten Laboratorio UVG

\_\_\_\_\_

Heces liquida almacenada en crio tubo

- Si  
 No

Fecha de elaboraci&ocuten

\_\_\_\_\_

Recepci&ocuten Laboratorio UVG

\_\_\_\_\_

Placa MacConkey para aislamiento de E. coli

- Si  
 No

Fecha de elaboraci&ocuten

\_\_\_\_\_

Recepci&ocuten Laboratorio UVG

\_\_\_\_\_

Placa de 96 pocillos con caldo LB

- Si  
 No

Fecha de elaboraci&ocuten

\_\_\_\_\_

Recepci&ocuten Laboratorio UVG

\_\_\_\_\_

Placas MacConkey con antibi&ocuteticos

- Si  
 No

Fecha de elaboraci&ocuten

\_\_\_\_\_

Fecha de elaboraci&ocuten

\_\_\_\_\_

---

---

**Pruebas de parásitos**

¿Se realizó la prueba de parásitos?

- Si
- No

Fecha en que se realizo la prueba de parásitos

\_\_\_\_\_

¿Resultado de prueba de parásitos?

- Helmintos
- Protozoos
- Ambos
- Negativo

Observaciones

\_\_\_\_\_
